# Supplementary material for: Integrated microbiome, metabolome and transcriptome profiling reveals the beneficial effects of fish oil and Bacillus subtilis jzxj-7 on mouse gut ecosystem
Source: Royal Society of Chemistry journal article supplement (doi:10.1039/d3fo04213h), 2024-01-01
Supplement: d3fo04213h1.xlsx [file d3fo04213h1.xlsx]

## Sheet: Supplementary microbiome data1
Quantification of microbes in samples of colonic content
sample	raw_tags	singleton	singleton%	tagsmatchedASVs	tags-matched-ASVs%	ASVs	raw_reads	clean_reads	OTUcounts
CK1	128221	210	0.16	115027	89.71	1443	155187	153988	365
CK2	125271	221	0.18	118351	94.48	1317	164279	142967	330
CK3	124592	229	0.18	115773	92.92	1382	144238	154775	370
CK4	124503	225	0.18	119722	96.16	1163	165210	163657	342
CK5	124385	198	0.16	114389	91.96	1403	178346	157834	375
CK6	124717	211	0.17	110321	88.46	1332	185310	176745	392
FO+JZXJ1	124211	242	0.19	117375	94.5	1329	123790	156784	373
FO+JZXJ2	124353	232	0.19	118557	95.34	1260	174194	144567	328
FO+JZXJ3	124426	233	0.19	118798	95.48	1266	177138	137564	319
FO+JZXJ4	100567	2	0	96770	96.22	1319	165346	127801	276
FO+JZXJ5	124346	236	0.19	112376	90.37	1309	113569	174526	384
FO+JZXJ6	124124	214	0.17	113155	91.16	1446	121630	156651	377

## Sheet: Supplementary microbiome data2
The Read of the phylum in all samples
Sample	PHYLUM	CLASS	ORDER	FAMILY	GENUS	SPECIES
CK1	1433	1433	1409	1403	1107	925
CK2	1308	1308	1295	1289	1014	856
CK3	1374	1374	1347	1345	1023	865
CK4	1160	1160	1149	1145	909	779
CK5	1393	1393	1369	1364	998	844
CK6	1321	1321	1298	1291	943	783
FO+JZXJ1	1320	1320	1303	1294	1005	840
FO+JZXJ2	1251	1251	1238	1235	953	797
FO+JZXJ3	1258	1258	1236	1230	937	788
FO+JZXJ4	1294	1294	1275	1267	902	730
FO+JZXJ5	1305	1305	1284	1274	990	829
FO+JZXJ6	1437	1437	1412	1403	1059	895

## Sheet: Supplementary microbiome data3
The relative abundance of the taxonomy in all samples
LEVEL2
#OTU ID	CK1	CK2	CK3	CK4	CK5	CK6	FO+JZXJ1	FO+JZXJ2	FO+JZXJ3	FO+JZXJ4	FO+JZXJ5	FO+JZXJ6
d__Bacteria;p__unidentified	0.04815	0.04908	0.04707	0.04817	0.04989	0.04962	0.04823	0.04954	0.04752	0.04098	0.04938	0.03794
d__Bacteria;p__Actinobacteriota	0.02216	0.02089	0.02384	0.03212	0.02275	0.01813	0.02304	0.02371	0.02412	0.02154	0.02083	0.02198
d__Bacteria;p__Bacteroidetes	0.46643	0.44116	0.48726	0.46129	0.49276	0.48839	0.53032	0.54976	0.54127	0.53458	0.54932	0.53432
d__Bacteria;p__Fusobacteria	0.01133	0.01232	0.03147	0.02232	0.01643	0.04578	0.03686	0.01723	0.01593	0.01605	0.01696	0.01727
d__Bacteria;p__Desulfobacterota	0.01624	0.01745	0.03767	0.01839	0.01493	0.01391	0.02176	0.02556	0.01898	0.01798	0.02023	0.01964
d__Bacteria;p__Firmicutes	0.29478	0.29349	0.29328	0.28321	0.27219	0.27784	0.31127	0.32932	0.33765	0.31065	0.30219	0.34769
d__Bacteria;p__Proteobacteria	0.08401	0.08355	0.08209	0.07221	0.05336	0.06111	0.01153	0.00465	0.00474	0.02488	0.00491	0.00603
d__Bacteria;p__Verrucomicrobiota	0.0645	0.09169	0.00583	0.06442	0.08517	0.05375	0.01947	0.00031	0.01821	0.03889	0.04598	0.01973
LEVEL3
d__Bacteria;p__;c__unidentified	0.00091	0.00038	0.00077	0.00017	0.00089	0.00062	0.00051	0.00046	0.00028	0.00348	0.00035	0.00101
d__Bacteria;p__Actinobacteriota;c__Actinobacteria	0.00768	0.00251	0.00015	7e-05	2e-05	2e-05	3e-05	0.00204	5e-05	0.00028	2e-05	4e-05
d__Bacteria;p__Actinobacteriota;c__Coriobacteriia	0.00038	0.00093	0.00099	0.00092	0.00033	0.00014	0.00071	0.00419	0.00097	0.00649	0.00034	0.00055
d__Bacteria;p__Bacteroidota;c__Bacteroidia	0.52755	0.6106	0.50858	0.62259	0.39374	0.21872	0.47116	0.55867	0.43461	0.49368	0.43751	0.45321
d__Bacteria;p__Cyanobacteria;c__Vampirivibrionia	0.0013	0.01756	0.01347	0.02247	0.00606	0.00028	0.00307	0.00244	0.002	0.00405	0.00133	0.00043
d__Bacteria;p__Deinococcota;c__Deinococci	0.00241	0.00018	0	0	0	0	0	1e-05	0	0	0	0
d__Bacteria;p__Desulfobacterota;c__Desulfovibrionia	0.00304	0.00221	0.00366	0.00475	0.00468	0.0081	0.00238	0.0025	0.00065	0.00556	0.00379	0.00273
d__Bacteria;p__Firmicutes;c__Bacilli	0.01116	0.01649	0.01823	0.02669	0.00737	0.00572	0.01709	0.0304	0.00566	0.01075	0.00795	0.00934
d__Bacteria;p__Firmicutes;c__Clostridia	0.43064	0.29589	0.43428	0.2738	0.5816	0.76583	0.49299	0.38439	0.53112	0.44742	0.5461	0.52688
d__Bacteria;p__Firmicutes;c__Negativicutes	0.00027	0.00015	0.00037	9e-05	1e-05	3e-05	0.00074	0.00026	2e-05	0.00026	0.00014	3e-05
d__Bacteria;p__Patescibacteria;c__Saccharimonadia	0.00089	0.00083	0.00074	0.00249	0.0003	0.00051	0.00049	0.00097	0.00079	0.00065	0.0002	0.00035
d__Bacteria;p__Proteobacteria;c__Alphaproteobacteria	0.00294	0.00113	0.00152	0.00183	0.00079	0.0001	0.00059	0.00027	0.00438	0.00225	0.0005	0.00021
d__Bacteria;p__Proteobacteria;c__Gammaproteobacteria	0.01107	0.02242	0.01057	0.01838	0.00257	0.00101	0.01094	0.01438	0.02036	0.02263	0.00241	0.00582
d__Bacteria;p__Verrucomicrobiota;c__Verrucomicrobiae	2e-05	0.0296	0.00744	0.02714	0.00172	0	4e-05	6e-05	8e-05	0.0008	2e-05	0.00016
LEVEL4
d__Bacteria;p__;c__;o__unidentified	0.00091	0.00038	0.00077	0.00017	0.00089	0.00062	0.00051	0.00046	0.00028	0.00348	0.00035	0.00101
d__Bacteria;p__Actinobacteriota;c__Actinobacteria;o__Bifidobacteriales	2e-05	0.00037	0.00011	5e-05	2e-05	2e-05	3e-05	0.00204	2e-05	0.00028	2e-05	4e-05
d__Bacteria;p__Actinobacteriota;c__Actinobacteria;o__Micrococcales	0.00578	0.00113	0	1e-05	0	0	0	0	3e-05	0	0	0
d__Bacteria;p__Actinobacteriota;c__Coriobacteriia;o__Coriobacteriales	0.00038	0.00093	0.00099	0.00092	0.00033	0.00014	0.00071	0.00419	0.00097	0.00649	0.00034	0.00055
d__Bacteria;p__Bacteroidota;c__Bacteroidia;o__Bacteroidales	0.52755	0.6106	0.50858	0.62259	0.39374	0.21872	0.47116	0.55867	0.43461	0.49368	0.43751	0.45321
d__Bacteria;p__Cyanobacteria;c__Vampirivibrionia;o__Gastranaerophilales	0.0013	0.01756	0.01347	0.02247	0.00606	0.00028	0.00307	0.00244	0.002	0.00405	0.00133	0.00043
d__Bacteria;p__Deinococcota;c__Deinococci;o__Thermales	0.00241	0.00018	0	0	0	0	0	1e-05	0	0	0	0
d__Bacteria;p__Desulfobacterota;c__Desulfovibrionia;o__Desulfovibrionales	0.00304	0.00221	0.00366	0.00475	0.00468	0.0081	0.00238	0.0025	0.00065	0.00556	0.00379	0.00273
d__Bacteria;p__Firmicutes;c__Bacilli;o__Acholeplasmatales	0.00071	3e-05	0.00041	0.00025	0.00466	0.00357	2e-05	1e-05	2e-05	0	8e-05	0
d__Bacteria;p__Firmicutes;c__Bacilli;o__Erysipelotrichales	0.00144	0.00383	0.00203	0.01132	0.00099	0.00034	0.00091	0.00227	0.00144	0.0024	0.00017	0.00155
d__Bacteria;p__Firmicutes;c__Bacilli;o__Izemoplasmatales	0	1e-05	7e-05	2e-05	0.00025	0	2e-05	0	0	0	2e-05	0
d__Bacteria;p__Firmicutes;c__Bacilli;o__Lactobacillales	0.00083	0.00498	0.01157	0.01287	0.00055	0.00078	0.01516	0.0272	0.00267	0.00657	0.0052	0.0067
d__Bacteria;p__Firmicutes;c__Bacilli;o__RF39	0.00273	0.00343	0.00412	0.00221	0.0009	0.00103	0.00098	0.00092	0.00153	0.00178	0.00248	0.00106
d__Bacteria;p__Firmicutes;c__Bacilli;o__Staphylococcales	0.00508	0.00421	3e-05	2e-05	1e-05	0	0	0	0	0	0	3e-05
d__Bacteria;p__Firmicutes;c__Clostridia;o__unidentified	0.0015	0.00211	0.00122	0.00055	0.00192	0.00349	0.00239	0.00277	0.00261	0.00284	0.00214	0.00235
d__Bacteria;p__Firmicutes;c__Clostridia;o__Christensenellales	0.00037	0.00046	0.00024	0.0001	9e-05	0.0001	0.00038	0.0014	0.00085	0.00129	0.00044	0.00034
d__Bacteria;p__Firmicutes;c__Clostridia;o__Clostridia_UCG-014	0.00618	0.01296	0.01458	0.00593	0.00564	0.00292	0.01642	0.01963	0.02539	0.02229	0.01537	0.00544
d__Bacteria;p__Firmicutes;c__Clostridia;o__Clostridia_vadinBB60_group	0.01334	0.01181	0.01521	0.0095	0.02535	0.01177	0.00383	0.00098	0.00385	0.00079	0.00201	0.00114
d__Bacteria;p__Firmicutes;c__Clostridia;o__Clostridiales	0.00027	0.00034	5e-05	0.00035	0.00012	1e-05	0.00016	0.0003	0.00013	0.00018	0.00057	2e-05
d__Bacteria;p__Firmicutes;c__Clostridia;o__Lachnospirales	0.34002	0.21685	0.31055	0.20473	0.46557	0.63066	0.37819	0.29595	0.39351	0.32594	0.40146	0.45124
d__Bacteria;p__Firmicutes;c__Clostridia;o__Monoglobales	0.00082	0.00194	0.00267	0.00021	0.00072	0.00139	0.00018	0.00027	0.00027	0.00033	0.0004	0.00039
d__Bacteria;p__Firmicutes;c__Clostridia;o__Oscillospirales	0.06556	0.04604	0.08567	0.0503	0.07857	0.10961	0.08647	0.05558	0.09256	0.0829	0.1166	0.06032
d__Bacteria;p__Firmicutes;c__Clostridia;o__Peptococcales	0.0017	0.00205	0.00311	0.00099	0.00302	0.00475	0.00419	0.00606	0.01063	0.00938	0.00623	0.00508
d__Bacteria;p__Firmicutes;c__Clostridia;o__Peptostreptococcales-Tissierellales	0.00087	0.0013	0.00095	0.00108	0.0006	0.00113	0.00077	0.00142	0.00131	0.00148	0.00087	0.00056
d__Bacteria;p__Firmicutes;c__Negativicutes;o__Veillonellales-Selenomonadales	0.00023	0.00011	0.00037	6e-05	1e-05	2e-05	0.00071	0.00024	2e-05	0.00017	0.00014	2e-05
d__Bacteria;p__Patescibacteria;c__Saccharimonadia;o__Saccharimonadales	0.00089	0.00083	0.00074	0.00249	0.0003	0.00051	0.00049	0.00097	0.00079	0.00065	0.0002	0.00035
d__Bacteria;p__Proteobacteria;c__Alphaproteobacteria;o__Rhodospirillales	0.00015	0.00104	0.00139	0.00181	0.00075	0.0001	0.00059	0.00027	0.00438	0.00225	0.0005	0.00021
d__Bacteria;p__Proteobacteria;c__Gammaproteobacteria;o__Burkholderiales	0.00363	0.022	0.01055	0.01835	0.00256	0.00068	0.01082	0.01433	0.02032	0.02263	0.00238	0.00581
d__Bacteria;p__Proteobacteria;c__Gammaproteobacteria;o__Enterobacterales	0.00023	0.00023	1e-05	2e-05	1e-05	0.00033	0.00012	4e-05	4e-05	0	3e-05	1e-05
d__Bacteria;p__Proteobacteria;c__Gammaproteobacteria;o__Oceanospirillales	0.00654	0	1e-05	1e-05	0	0	0	1e-05	0	0	0	0
d__Bacteria;p__Verrucomicrobiota;c__Verrucomicrobiae;o__Verrucomicrobiales	2e-05	0.0296	0.00744	0.02714	0.00172	0	4e-05	6e-05	8e-05	0.0008	2e-05	0.00016
LEVEL5
d__Bacteria;p__;c__;o__;f__unidentified	0.00091	0.00038	0.00077	0.00017	0.00089	0.00062	0.00051	0.00046	0.00028	0.00348	0.00035	0.00101
d__Bacteria;p__Actinobacteriota;c__Actinobacteria;o__Bifidobacteriales;f__Bifidobacteriaceae	2e-05	0.00037	0.00011	5e-05	2e-05	2e-05	3e-05	0.00204	2e-05	0.00028	2e-05	4e-05
d__Bacteria;p__Actinobacteriota;c__Actinobacteria;o__Micrococcales;f__Brevibacteriaceae	0.00566	0.00113	0	1e-05	0	0	0	0	3e-05	0	0	0
d__Bacteria;p__Actinobacteriota;c__Coriobacteriia;o__Coriobacteriales;f__Atopobiaceae	3e-05	8e-05	0.0001	0.00015	1e-05	0	0.00035	0.00257	0.00075	0.00577	7e-05	0.00023
d__Bacteria;p__Actinobacteriota;c__Coriobacteriia;o__Coriobacteriales;f__Eggerthellaceae	0.00035	0.00085	0.00089	0.00077	0.00032	0.00014	0.00036	0.00162	0.00022	0.00072	0.00027	0.00032
d__Bacteria;p__Bacteroidota;c__Bacteroidia;o__Bacteroidales;f__unidentified	0.00018	0.00026	7e-05	0.00011	0.00012	0.00025	0.00018	0.00022	0.00011	0.00057	0.00038	0.00032
d__Bacteria;p__Bacteroidota;c__Bacteroidia;o__Bacteroidales;f__Bacteroidaceae	0.00552	0.0126	0.01202	0.0066	0.00664	0.00615	0.0266	0.01893	0.02001	0.01517	0.02838	0.01142
d__Bacteria;p__Bacteroidota;c__Bacteroidia;o__Bacteroidales;f__Marinifilaceae	0.00085	0.00175	0.00101	0.0018	0.00121	0.0011	0.00039	0.00023	0.00109	0.00044	0.00048	0.00025
d__Bacteria;p__Bacteroidota;c__Bacteroidia;o__Bacteroidales;f__Muribaculaceae	0.43573	0.47148	0.43449	0.51327	0.31184	0.13592	0.4042	0.46973	0.37649	0.41327	0.32153	0.39611
d__Bacteria;p__Bacteroidota;c__Bacteroidia;o__Bacteroidales;f__Prevotellaceae	0.01871	0.05244	0.03867	0.02822	0.03493	0.00685	0.02062	0.05796	0.01444	0.04767	0.0562	0.03263
d__Bacteria;p__Bacteroidota;c__Bacteroidia;o__Bacteroidales;f__Rikenellaceae	0.066	0.07164	0.02192	0.07237	0.03894	0.06824	0.01902	0.01151	0.02223	0.01625	0.03052	0.01242
d__Bacteria;p__Bacteroidota;c__Bacteroidia;o__Bacteroidales;f__Tannerellaceae	0.00056	0.00043	0.0004	0.00022	6e-05	0.00021	0.00014	9e-05	0.00024	0.00019	2e-05	6e-05
d__Bacteria;p__Cyanobacteria;c__Vampirivibrionia;o__Gastranaerophilales;f__Gastranaerophilales	0.0013	0.01756	0.01347	0.02247	0.00606	0.00028	0.00307	0.00244	0.002	0.00405	0.00133	0.00043
d__Bacteria;p__Deinococcota;c__Deinococci;o__Thermales;f__Thermaceae	0.00241	0.00018	0	0	0	0	0	1e-05	0	0	0	0
d__Bacteria;p__Desulfobacterota;c__Desulfovibrionia;o__Desulfovibrionales;f__Desulfovibrionaceae	0.00304	0.00221	0.00366	0.00475	0.00468	0.0081	0.00238	0.0025	0.00065	0.00556	0.00379	0.00273
d__Bacteria;p__Firmicutes;c__Bacilli;o__Acholeplasmatales;f__Acholeplasmataceae	0.00071	3e-05	0.00041	0.00025	0.00466	0.00357	2e-05	1e-05	2e-05	0	8e-05	0
d__Bacteria;p__Firmicutes;c__Bacilli;o__Erysipelotrichales;f__Erysipelatoclostridiaceae	8e-05	0.00025	0.00022	4e-05	0.00011	2e-05	0.00051	0.00145	0.00085	0.00164	4e-05	0.00067
d__Bacteria;p__Firmicutes;c__Bacilli;o__Erysipelotrichales;f__Erysipelotrichaceae	0.00136	0.00358	0.00181	0.01128	0.00088	0.00032	0.00037	0.00082	0.00059	0.00076	0.00013	0.00087
d__Bacteria;p__Firmicutes;c__Bacilli;o__Izemoplasmatales;f__Izemoplasmatales	0	1e-05	7e-05	2e-05	0.00025	0	2e-05	0	0	0	2e-05	0
d__Bacteria;p__Firmicutes;c__Bacilli;o__Lactobacillales;f__Enterococcaceae	3e-05	0.00018	3e-05	0	0	0	0	0	0	0	0	0
d__Bacteria;p__Firmicutes;c__Bacilli;o__Lactobacillales;f__Lactobacillaceae	0.00076	0.00478	0.01141	0.01262	0.00053	0.00049	0.01515	0.02715	0.00266	0.00657	0.0052	0.0067
d__Bacteria;p__Firmicutes;c__Bacilli;o__RF39;f__RF39	0.00273	0.00343	0.00412	0.00221	0.0009	0.00103	0.00098	0.00092	0.00153	0.00178	0.00248	0.00106
d__Bacteria;p__Firmicutes;c__Bacilli;o__Staphylococcales;f__Staphylococcaceae	0.00508	0.00421	3e-05	2e-05	1e-05	0	0	0	0	0	0	3e-05
d__Bacteria;p__Firmicutes;c__Clostridia;o__;f__unidentified	0.0015	0.00211	0.00122	0.00055	0.00192	0.00349	0.00239	0.00277	0.00261	0.00284	0.00214	0.00235
d__Bacteria;p__Firmicutes;c__Clostridia;o__Christensenellales;f__Christensenellaceae	0.00037	0.00046	0.00024	0.0001	9e-05	0.0001	0.00038	0.0014	0.00085	0.00129	0.00044	0.00034
d__Bacteria;p__Firmicutes;c__Clostridia;o__Clostridia_UCG-014;f__Clostridia_UCG-014	0.00618	0.01296	0.01458	0.00593	0.00564	0.00292	0.01642	0.01963	0.02539	0.02229	0.01537	0.00544
d__Bacteria;p__Firmicutes;c__Clostridia;o__Clostridia_vadinBB60_group;f__Clostridia_vadinBB60_group	0.01334	0.01181	0.01521	0.0095	0.02535	0.01177	0.00383	0.00098	0.00385	0.00079	0.00201	0.00114
d__Bacteria;p__Firmicutes;c__Clostridia;o__Clostridiales;f__Clostridiaceae	0.00027	0.00034	5e-05	0.00035	0.00012	1e-05	0.00016	0.0003	0.00013	0.00018	0.00057	2e-05
d__Bacteria;p__Firmicutes;c__Clostridia;o__Lachnospirales;f__Defluviitaleaceae	2e-05	8e-05	7e-05	2e-05	0	7e-05	0.00011	0.00013	0.0005	0.00017	9e-05	0.0003
d__Bacteria;p__Firmicutes;c__Clostridia;o__Lachnospirales;f__Lachnospiraceae	0.33994	0.2167	0.31048	0.20471	0.46547	0.63057	0.37805	0.29582	0.393	0.32568	0.40128	0.45085
d__Bacteria;p__Firmicutes;c__Clostridia;o__Monoglobales;f__Monoglobaceae	0.00082	0.00194	0.00267	0.00021	0.00072	0.00139	0.00018	0.00027	0.00027	0.00033	0.0004	0.00039
d__Bacteria;p__Firmicutes;c__Clostridia;o__Oscillospirales;f__unidentified	1e-05	2e-05	0	0	5e-05	3e-05	1e-05	0	0.00046	0.0006	0.00012	1e-05
d__Bacteria;p__Firmicutes;c__Clostridia;o__Oscillospirales;f__Butyricicoccaceae	0.00283	0.0008	0.00385	0.0008	0.00387	0.00865	0.00073	0.0007	0.00334	0.00462	0.00396	0.0075
d__Bacteria;p__Firmicutes;c__Clostridia;o__Oscillospirales;f__Oscillospiraceae	0.04874	0.03343	0.05257	0.0364	0.05264	0.07223	0.04017	0.02587	0.04858	0.03667	0.09537	0.03992
d__Bacteria;p__Firmicutes;c__Clostridia;o__Oscillospirales;f__Ruminococcaceae	0.01277	0.01028	0.02792	0.01242	0.01976	0.02845	0.03548	0.02425	0.03263	0.02336	0.01452	0.01083
d__Bacteria;p__Firmicutes;c__Clostridia;o__Oscillospirales;f__UCG-010	0.00023	0.00076	0.0003	0.00062	0.00018	4e-05	0.00044	0.00046	0.0006	0.00053	0.00038	0.00021
d__Bacteria;p__Firmicutes;c__Clostridia;o__Oscillospirales;f__[Eubacterium]_coprostanoligenes_group	0.00098	0.00075	0.00103	6e-05	0.00207	0.00021	0.00964	0.0043	0.00695	0.01712	0.00225	0.00185
d__Bacteria;p__Firmicutes;c__Clostridia;o__Peptococcales;f__Peptococcaceae	0.0017	0.00205	0.00311	0.00099	0.00302	0.00475	0.00419	0.00606	0.01063	0.00938	0.00623	0.00508
d__Bacteria;p__Firmicutes;c__Clostridia;o__Peptostreptococcales-Tissierellales;f__Anaerovoracaceae	0.00068	0.0007	0.00072	0.00045	0.00054	0.00113	0.00077	0.00141	0.00131	0.00148	0.00087	0.00054
d__Bacteria;p__Firmicutes;c__Clostridia;o__Peptostreptococcales-Tissierellales;f__Peptostreptococcaceae	0.00019	0.0006	0.00023	0.00063	6e-05	0	0	1e-05	0	0	0	2e-05
d__Bacteria;p__Patescibacteria;c__Saccharimonadia;o__Saccharimonadales;f__Saccharimonadaceae	0.00089	0.00083	0.00074	0.00249	0.0003	0.00051	0.00049	0.00097	0.00079	0.00065	0.0002	0.00035
d__Bacteria;p__Proteobacteria;c__Alphaproteobacteria;o__Rhodospirillales;f__uncultured	0.00015	0.00104	0.00139	0.00181	0.00075	0.0001	0.00059	0.00027	0.00438	0.00225	0.0005	0.00021
d__Bacteria;p__Proteobacteria;c__Gammaproteobacteria;o__Burkholderiales;f__Sutterellaceae	0.00256	0.022	0.01055	0.01835	0.00256	0.00068	0.01082	0.01433	0.02032	0.02263	0.00238	0.00581
d__Bacteria;p__Proteobacteria;c__Gammaproteobacteria;o__Enterobacterales;f__Enterobacteriaceae	0.00023	0.00023	1e-05	2e-05	1e-05	0.00033	0.00012	4e-05	4e-05	0	3e-05	1e-05
d__Bacteria;p__Proteobacteria;c__Gammaproteobacteria;o__Oceanospirillales;f__Halomonadaceae	0.00654	0	1e-05	1e-05	0	0	0	1e-05	0	0	0	0
d__Bacteria;p__Verrucomicrobiota;c__Verrucomicrobiae;o__Verrucomicrobiales;f__Akkermansiaceae	2e-05	0.0296	0.00744	0.02714	0.00172	0	4e-05	6e-05	8e-05	0.0008	2e-05	0.00016
LEVEL6
d__Bacteria;p__;c__;o__;f__;g__unidentified	0.00091	0.00038	0.00077	0.00017	0.00089	0.00062	0.00051	0.00046	0.00028	0.00348	0.00035	0.00101
d__Bacteria;p__Actinobacteriota;c__Actinobacteria;o__Bifidobacteriales;f__Bifidobacteriaceae;g__Bifidobacterium	0.01024	0.01136	0.00998	0.01364	0.01135	0.01273	0.02019	0.02224	0.02487	0.02581	0.02156	0.02378
d__Bacteria;p__Actinobacteriota;c__Actinobacteria;o__Micrococcales;f__Brevibacteriaceae;g__Brevibacterium	0.00566	0.00113	0	1e-05	0	0	0	0	3e-05	0	0	0
d__Bacteria;p__Actinobacteriota;c__Coriobacteriia;o__Coriobacteriales;f__Atopobiaceae;g__Coriobacteriaceae_UCG-002	3e-05	8e-05	0.0001	0.00015	1e-05	0	0.00035	0.00257	0.00075	0.00577	7e-05	0.00023
d__Bacteria;p__Actinobacteriota;c__Coriobacteriia;o__Coriobacteriales;f__Eggerthellaceae;g__unidentified	0.00014	0.00015	0.0001	0.0001	6e-05	1e-05	0.00019	0.00026	0.00017	9e-05	9e-05	0.00011
d__Bacteria;p__Actinobacteriota;c__Coriobacteriia;o__Coriobacteriales;f__Eggerthellaceae;g__Enterorhabdus	0.00021	0.0007	0.00079	0.00067	0.00026	0.00013	0.00017	0.00136	5e-05	0.00063	0.00018	0.00021
d__Bacteria;p__Bacteroidota;c__Bacteroidia;o__Bacteroidales;f__;g__unidentified	0.00018	0.00026	7e-05	0.00011	0.00012	0.00025	0.00018	0.00022	0.00011	0.00057	0.00038	0.00032
d__Bacteria;p__Bacteroidota;c__Bacteroidia;o__Bacteroidales;f__Bacteroidaceae;g__Bacteroides	0.00552	0.0126	0.01202	0.0066	0.00664	0.00615	0.0266	0.01893	0.02001	0.01517	0.02838	0.01142
d__Bacteria;p__Bacteroidota;c__Bacteroidia;o__Bacteroidales;f__Marinifilaceae;g__Odoribacter	0.00085	0.00175	0.00101	0.0018	0.00121	0.0011	0.00039	0.00023	0.00109	0.00044	0.00048	0.00025
d__Bacteria;p__Bacteroidota;c__Bacteroidia;o__Bacteroidales;f__Muribaculaceae;g__unclassified	0.50806	0.44072	0.48149	0.49745	0.42654	0.42996	0.46153	0.43749	0.39032	0.28257	0.39843	0.43254
d__Bacteria;p__Bacteroidota;c__Bacteroidia;o__Bacteroidales;f__Muribaculaceae;g__Muribaculum	0.00767	0.01076	0.003	0.00582	0.0053	0.00596	0.00317	0.00219	0.00592	0.00031	0.00254	0.00373
d__Bacteria;p__Bacteroidota;c__Bacteroidia;o__Bacteroidales;f__Prevotellaceae;g__Alloprevotella	0.00673	0.02243	0.01076	0.00891	0.01111	0.00239	0.01511	0.0417	0.0074	0.04161	0.01959	0.02442
d__Bacteria;p__Bacteroidota;c__Bacteroidia;o__Bacteroidales;f__Prevotellaceae;g__Prevotella	0.00153	0.00187	0.00075	0.00038	3e-05	0.0003	5e-05	0.00051	0	0.00077	0.00017	5e-05
d__Bacteria;p__Bacteroidota;c__Bacteroidia;o__Bacteroidales;f__Prevotellaceae;g__Prevotellaceae_UCG-001	0.01042	0.0281	0.02716	0.01893	0.02379	0.00414	0.00546	0.01575	0.00704	0.00512	0.03644	0.00816
d__Bacteria;p__Bacteroidota;c__Bacteroidia;o__Bacteroidales;f__Rikenellaceae;g__Alistipes	0.06365	0.0662	0.01578	0.06356	0.03214	0.06471	0.01142	0.00693	0.01632	0.01249	0.02697	0.01042
d__Bacteria;p__Bacteroidota;c__Bacteroidia;o__Bacteroidales;f__Rikenellaceae;g__Rikenellaceae_RC9_gut_group	0.00235	0.00544	0.00614	0.00881	0.0068	0.00353	0.0076	0.00458	0.00591	0.00376	0.00355	0.002
d__Bacteria;p__Bacteroidota;c__Bacteroidia;o__Bacteroidales;f__Tannerellaceae;g__Parabacteroides	0.00056	0.00043	0.0004	0.00022	6e-05	0.00021	0.00014	9e-05	0.00024	0.00019	2e-05	6e-05
d__Bacteria;p__Cyanobacteria;c__Vampirivibrionia;o__Gastranaerophilales;f__Gastranaerophilales;g__Gastranaerophilales	0.0013	0.01756	0.01347	0.02247	0.00606	0.00028	0.00307	0.00244	0.002	0.00405	0.00133	0.00043
d__Bacteria;p__Deinococcota;c__Deinococci;o__Thermales;f__Thermaceae;g__Meiothermus	0.00241	0.00018	0	0	0	0	0	1e-05	0	0	0	0
d__Bacteria;p__Desulfobacterota;c__Desulfovibrionia;o__Desulfovibrionales;f__Desulfovibrionaceae;g__Bilophila	0.00263	0.00213	0.00336	0.00428	0.00444	0.00765	0.00218	0.00231	0.00053	0.00432	0.00335	0.00255
d__Bacteria;p__Desulfobacterota;c__Desulfovibrionia;o__Desulfovibrionales;f__Desulfovibrionaceae;g__Desulfovibrio	0.0004	8e-05	0.00029	0.00045	0.00021	0.0004	0.0002	0.00019	0.00011	0.00089	0.00044	0.00016
d__Bacteria;p__Firmicutes;c__Bacilli;o__Acholeplasmatales;f__Acholeplasmataceae;g__Anaeroplasma	0.00071	3e-05	0.00041	0.00025	0.00466	0.00357	2e-05	1e-05	2e-05	0	8e-05	0
d__Bacteria;p__Firmicutes;c__Bacilli;o__Erysipelotrichales;f__Erysipelatoclostridiaceae;g__Erysipelatoclostridium	8e-05	0.00023	0.00019	4e-05	8e-05	1e-05	0.00042	0.00033	0.00042	0.0015	3e-05	0.00061
d__Bacteria;p__Firmicutes;c__Bacilli;o__Erysipelotrichales;f__Erysipelotrichaceae;g__Dubosiella	5e-05	0.00088	0.00067	0.00222	5e-05	0	0.00012	0.00036	0.00017	0.00041	0	1e-05
d__Bacteria;p__Firmicutes;c__Bacilli;o__Erysipelotrichales;f__Erysipelotrichaceae;g__Faecalibaculum	0.05213	0.050122	0.04989	0.05213	0.04899	0.05173	0.06573	0.06392	0.06617	0.06132	0.06939	0.06732
d__Bacteria;p__Firmicutes;c__Bacilli;o__Erysipelotrichales;f__Erysipelotrichaceae;g__Ileibacterium	0	0	0	0	0	0	0	5e-05	0	0	0	0
d__Bacteria;p__Firmicutes;c__Bacilli;o__Erysipelotrichales;f__Erysipelotrichaceae;g__Turicibacter	0.00085	0.00207	0.0006	0.0087	0.00051	1e-05	0	0	2e-05	0	0	0
d__Bacteria;p__Firmicutes;c__Bacilli;o__Erysipelotrichales;f__Erysipelotrichaceae;g__uncultured	0.00044	0.00025	0.00047	0.0003	0.00032	0.00031	0.00023	0.00028	0.00037	0.00035	0.00013	0.00086
d__Bacteria;p__Firmicutes;c__Bacilli;o__Izemoplasmatales;f__Izemoplasmatales;g__Izemoplasmatales	0	1e-05	7e-05	2e-05	0.00025	0	2e-05	0	0	0	2e-05	0
d__Bacteria;p__Firmicutes;c__Bacilli;o__Lactobacillales;f__Enterococcaceae;g__Enterococcus	3e-05	0.00018	3e-05	0	0	0	0	0	0	0	0	0
d__Bacteria;p__Firmicutes;c__Bacilli;o__Lactobacillales;f__Lactobacillaceae;g__Lactobacillus	0.06013	0.062122	0.06189	0.06313	0.06199	0.06216	0.08073	0.08202	0.08318	0.08162	0.08439	0.08562
d__Bacteria;p__Firmicutes;c__Bacilli;o__RF39;f__RF39;g__RF39	0.00273	0.00343	0.00412	0.00221	0.0009	0.00103	0.00098	0.00092	0.00153	0.00178	0.00248	0.00106
d__Bacteria;p__Firmicutes;c__Bacilli;o__Staphylococcales;f__Staphylococcaceae;g__Staphylococcus	0.00508	0.00421	3e-05	2e-05	1e-05	0	0	0	0	0	0	3e-05
d__Bacteria;p__Firmicutes;c__Clostridia;o__;f__;g__unidentified	0.0015	0.00211	0.00122	0.00055	0.00192	0.00349	0.00239	0.00277	0.00261	0.00284	0.00214	0.00235
d__Bacteria;p__Firmicutes;c__Clostridia;o__Christensenellales;f__Christensenellaceae;g__Christensenellaceae_R-7_group	0.00026	0.00046	0.00023	6e-05	5e-05	3e-05	0.00032	0.00116	0.00067	0.00122	0.00016	0.00023
d__Bacteria;p__Firmicutes;c__Clostridia;o__Christensenellales;f__Christensenellaceae;g__uncultured	0.00011	0	1e-05	4e-05	4e-05	7e-05	6e-05	0.00024	0.00018	7e-05	0.00028	0.00011
d__Bacteria;p__Firmicutes;c__Clostridia;o__Clostridia_UCG-014;f__Clostridia_UCG-014;g__Clostridia_UCG-014	0.00618	0.01296	0.01458	0.00593	0.00564	0.00292	0.01642	0.01963	0.02539	0.02229	0.01537	0.00544
d__Bacteria;p__Firmicutes;c__Clostridia;o__Clostridia_vadinBB60_group;f__Clostridia_vadinBB60_group;g__Clostridia_vadinBB60_group	0.01334	0.01181	0.01521	0.0095	0.02535	0.01177	0.00383	0.00098	0.00385	0.00079	0.00201	0.00114
d__Bacteria;p__Firmicutes;c__Clostridia;o__Clostridiales;f__Clostridiaceae;g__Clostridium_sensu_stricto_1	2e-05	5e-05	3e-05	0.00028	2e-05	0	0	0	0	0	1e-05	0
d__Bacteria;p__Firmicutes;c__Clostridia;o__Lachnospirales;f__Defluviitaleaceae;g__Defluviitaleaceae_UCG-011	2e-05	8e-05	7e-05	2e-05	0	7e-05	0.00011	0.00013	0.0005	0.00017	9e-05	0.0003
d__Bacteria;p__Firmicutes;c__Clostridia;o__Lachnospirales;f__Lachnospiraceae;g__unidentified	0.10121	0.04359	0.1112	0.03849	0.12999	0.13233	0.0596	0.04604	0.11363	0.18373	0.10495	0.13916
d__Bacteria;p__Firmicutes;c__Clostridia;o__Lachnospirales;f__Lachnospiraceae;g__A2	0.00023	0.00327	0.00043	0.00014	0.00019	0.00045	0.00032	0.00067	0.00023	0.00016	0.0002	0.0001
d__Bacteria;p__Firmicutes;c__Clostridia;o__Lachnospirales;f__Lachnospiraceae;g__ASF356	0.00339	0.00132	0.00262	0.00071	0.01205	0.00806	0.0054	0.00279	0.00287	0.0011	0.00701	0.00061
d__Bacteria;p__Firmicutes;c__Clostridia;o__Lachnospirales;f__Lachnospiraceae;g__Acetatifactor	0.00047	0.00021	0.00068	0.00038	0.00018	5e-05	0.00012	9e-05	3e-05	0.00022	5e-05	9e-05
d__Bacteria;p__Firmicutes;c__Clostridia;o__Lachnospirales;f__Lachnospiraceae;g__Blautia	0.00078	0.00013	9e-05	0.00889	0.0067	7e-05	0.00017	0.00014	0.00036	0.00231	0.00053	0.00559
d__Bacteria;p__Firmicutes;c__Clostridia;o__Lachnospirales;f__Lachnospiraceae;g__GCA-900066575	0.00337	0.00359	0.00751	0.00297	0.00436	0.00719	0.00296	0.00314	0.00346	0.00297	0.00257	0.00282
d__Bacteria;p__Firmicutes;c__Clostridia;o__Lachnospirales;f__Lachnospiraceae;g__Lachnoclostridium	0.00151	0.00183	0.00232	0.00153	0.00139	0.01114	0.00241	0.00592	0.00577	0.00458	0.00266	0.00143
d__Bacteria;p__Firmicutes;c__Clostridia;o__Lachnospirales;f__Lachnospiraceae;g__Lachnospiraceae_FCS020_group	0.0007	0.00069	0.00063	0.00043	0.00092	0.00076	0.00063	0.00068	0.00146	0.00127	0.00103	0.00087
d__Bacteria;p__Firmicutes;c__Clostridia;o__Lachnospirales;f__Lachnospiraceae;g__Lachnospiraceae_NK4B4	0.06704	0.07611	0.06598	0.06893	0.07123	0.07721	0.1023	0.1168	0.09913	0.11526	0.10298	0.09321
d__Bacteria;p__Firmicutes;c__Clostridia;o__Lachnospirales;f__Lachnospiraceae;g__Lachnospiraceae_UCG-001	0.00503	0.00159	0.0016	0.00269	0.02529	0.01172	0.00404	0.00434	0.00171	0.00236	0	0.00117
d__Bacteria;p__Firmicutes;c__Clostridia;o__Lachnospirales;f__Lachnospiraceae;g__Lachnospiraceae_UCG-006	0.0005	0.00026	0.00075	0.00032	0.00058	0.00115	0.00105	0.0022	0.0005	0.0003	0.00346	0.00059
d__Bacteria;p__Firmicutes;c__Clostridia;o__Lachnospirales;f__Lachnospiraceae;g__Roseburia	0.0129	0.01946	0.00814	0.00849	0.02999	0.06457	0.01476	0.01207	0.00841	0.01137	0.01454	0.02507
d__Bacteria;p__Firmicutes;c__Clostridia;o__Lachnospirales;f__Lachnospiraceae;g__Tuzzerella	0.00046	0.00072	0.0006	0.00071	0.00021	0.00045	0.00037	0.00051	0.00036	0.00055	0.00116	0.00077
d__Bacteria;p__Firmicutes;c__Clostridia;o__Lachnospirales;f__Lachnospiraceae;g__Tyzzerella	0.00023	0.00025	3e-05	0.00095	0.00099	0.00078	1e-05	0	8e-05	0.00026	0.00103	0.00011
d__Bacteria;p__Firmicutes;c__Clostridia;o__Lachnospirales;f__Lachnospiraceae;g__[Eubacterium]_ventriosum_group	0	0.00014	0	0	0	0	0.00176	0.01012	0.00488	6e-05	0	0.00614
d__Bacteria;p__Firmicutes;c__Clostridia;o__Lachnospirales;f__Lachnospiraceae;g__[Eubacterium]_xylanophilum_group	0.00267	0.00363	0.00604	0.0018	0.00486	0.00933	0.0118	0.01758	0.01529	0.01432	0.00328	0.01014
d__Bacteria;p__Firmicutes;c__Clostridia;o__Lachnospirales;f__Lachnospiraceae;g__uncultured	0.00564	0.00275	0.00227	0.00451	0.00281	0.01275	0.00258	0.00268	0.00148	0.00403	0.01582	0.00347
d__Bacteria;p__Firmicutes;c__Clostridia;o__Monoglobales;f__Monoglobaceae;g__Monoglobus	0.00082	0.00194	0.00267	0.00021	0.00072	0.00139	0.00018	0.00027	0.00027	0.00033	0.0004	0.00039
d__Bacteria;p__Firmicutes;c__Clostridia;o__Oscillospirales;f__;g__unidentified	1e-05	2e-05	0	0	5e-05	3e-05	1e-05	0	0.00046	0.0006	0.00012	1e-05
d__Bacteria;p__Firmicutes;c__Clostridia;o__Oscillospirales;f__Butyricicoccaceae;g__Butyricicoccus	0.00175	0.0007	0.00315	0.00059	0.00339	0.00813	0.00043	0.00057	0.00324	0.00452	0.00368	0.00722
d__Bacteria;p__Firmicutes;c__Clostridia;o__Oscillospirales;f__Butyricicoccaceae;g__UCG-009	0.00108	0.0001	0.0007	0.00021	0.00048	0.00052	0.0003	0.00013	0.0001	0.0001	0.00028	0.00028
d__Bacteria;p__Firmicutes;c__Clostridia;o__Oscillospirales;f__Ruminococcaceae;g__CAG-352	3e-05	0.00232	0.00212	0.00144	0.00057	0.00044	0	0	0	0	0	0
d__Bacteria;p__Firmicutes;c__Clostridia;o__Oscillospirales;f__Ruminococcaceae;g__Faecalibacterium	0.00042	0.0002	8e-05	6e-05	0	0.00014	0.00041	7e-05	6e-05	0.00115	6e-05	1e-05
d__Bacteria;p__Firmicutes;c__Clostridia;o__Oscillospirales;f__Ruminococcaceae;g__Incertae_Sedis	0.00266	0.00321	0.01352	0.00272	0.00541	0.01053	0.00678	0.00655	0.01296	0.00744	0.00816	0.00344
d__Bacteria;p__Firmicutes;c__Clostridia;o__Oscillospirales;f__Ruminococcaceae;g__Ruminococcaceae	0.00185	0.0001	0.00097	0.0001	0.00076	0.00044	0.00013	0.00012	0.0014	0	0	7e-05
d__Bacteria;p__Firmicutes;c__Clostridia;o__Oscillospirales;f__Ruminococcaceae;g__Ruminococcus	0.00113	0.00031	0.00322	0.0006	0.00526	0.007	0.0245	0.01486	0.00672	0.01039	0.00014	0.002
d__Bacteria;p__Firmicutes;c__Clostridia;o__Oscillospirales;f__Ruminococcaceae;g__UBA1819	0	4e-05	0.00062	0.00016	3e-05	4e-05	0.00014	0.00018	0.00516	0.00034	0.00032	0.0002
d__Bacteria;p__Firmicutes;c__Clostridia;o__Oscillospirales;f__Ruminococcaceae;g__[Eubacterium]_siraeum_group	0.0007	5e-05	0.00021	0.00306	1e-05	2e-05	3e-05	7e-05	0.00069	0	0.00045	0.00025
d__Bacteria;p__Firmicutes;c__Clostridia;o__Oscillospirales;f__Ruminococcaceae;g__uncultured	0.00105	0.00103	0.00094	0.00106	0.00153	0.00273	0.00062	0.00044	0.00102	0.00088	0.0007	0.00056
d__Bacteria;p__Firmicutes;c__Clostridia;o__Oscillospirales;f__UCG-010;g__UCG-010	0.00023	0.00076	0.0003	0.00062	0.00018	4e-05	0.00044	0.00046	0.0006	0.00053	0.00038	0.00021
d__Bacteria;p__Firmicutes;c__Clostridia;o__Oscillospirales;f__[Eubacterium]_coprostanoligenes_group;g__[Eubacterium]_coprostanoligenes_group	0.00098	0.00075	0.00103	6e-05	0.00207	0.00021	0.00964	0.0043	0.00695	0.01712	0.00225	0.00185
d__Bacteria;p__Firmicutes;c__Clostridia;o__Peptococcales;f__Peptococcaceae;g__Peptococcus	2e-05	3e-05	4e-05	0.0001	0.00034	0.00011	0	0	1e-05	0	5e-05	0.00018
d__Bacteria;p__Firmicutes;c__Clostridia;o__Peptococcales;f__Peptococcaceae;g__uncultured	0.00168	0.00202	0.00307	0.00089	0.00268	0.00464	0.00419	0.00606	0.01062	0.00938	0.00618	0.0049
d__Bacteria;p__Firmicutes;c__Clostridia;o__Peptostreptococcales-Tissierellales;f__Anaerovoracaceae;g__unidentified	0.00025	0.00046	0.00034	0.00028	0.0002	0.00033	0.00024	0.00029	0.00045	0.00057	0.00022	0.00011
d__Bacteria;p__Firmicutes;c__Clostridia;o__Peptostreptococcales-Tissierellales;f__Anaerovoracaceae;g__Anaerovorax	0	1e-05	4e-05	6e-05	0	9e-05	2e-05	4e-05	0.00017	0.00013	2e-05	3e-05
d__Bacteria;p__Firmicutes;c__Clostridia;o__Peptostreptococcales-Tissierellales;f__Anaerovoracaceae;g__Family_XIII_UCG-001	0.00016	5e-05	0.00025	8e-05	0.00017	0.00041	9e-05	0.00015	0.00018	0.00031	0.00027	0.00012
d__Bacteria;p__Firmicutes;c__Clostridia;o__Peptostreptococcales-Tissierellales;f__Anaerovoracaceae;g__[Eubacterium]_nodatum_group	0.0002	0.00014	5e-05	0	0.00011	0.00024	0.00034	0.00076	0.00043	0.00042	0.00028	0.0002
d__Bacteria;p__Firmicutes;c__Clostridia;o__Peptostreptococcales-Tissierellales;f__Peptostreptococcaceae;g__Romboutsia	0.00019	0.0006	0.00023	0.00063	6e-05	0	0	1e-05	0	0	0	2e-05
d__Bacteria;p__Patescibacteria;c__Saccharimonadia;o__Saccharimonadales;f__Saccharimonadaceae;g__Candidatus_Saccharimonas	0.00089	0.00083	0.00074	0.00249	0.0003	0.00051	0.00049	0.00097	0.00079	0.00065	0.0002	0.00035
d__Bacteria;p__Proteobacteria;c__Gammaproteobacteria;o__Burkholderiales;f__Sutterellaceae;g__Parasutterella	0.00256	0.022	0.01055	0.01835	0.00256	0.00068	0.01082	0.01433	0.02032	0.02263	0.00238	0.00581
d__Bacteria;p__Proteobacteria;c__Gammaproteobacteria;o__Enterobacterales;f__Enterobacteriaceae;g__Enterobacter	6e-05	0.00014	0	1e-05	1e-05	0.0001	1e-05	0	2e-05	0	1e-05	1e-05
d__Bacteria;p__Proteobacteria;c__Gammaproteobacteria;o__Enterobacterales;f__Enterobacteriaceae;g__Escherichia-Shigella	0.01822	0.01693	0.01791	0.01469	0.01576	0.01683	0.00632	0.00577	0.00602	0.00478	0.00535	0.00542
d__Bacteria;p__Proteobacteria;c__Gammaproteobacteria;o__Oceanospirillales;f__Halomonadaceae;g__Halomonas	0.00654	0	1e-05	1e-05	0	0	0	1e-05	0	0	0	0
d__Bacteria;p__Verrucomicrobiota;c__Verrucomicrobiae;o__Verrucomicrobiales;f__Akkermansiaceae;g__Akkermansia	2e-05	0.0296	0.00744	0.02714	0.00172	0	4e-05	6e-05	8e-05	0.0008	2e-05	0.00016

## Sheet: Supplementary metabolome Data
name	ID	mz	rt	ppm	formula	KEGG	CK_Mean	CK_Median	CK_RSD	PP_Mean	PP_Median	PP_RSD	FC	log2FC	P.value	-log10(P.value)	FDR	VIP	posneg
gamma-Aminobutyric acid	M103T200	103.054	200	7.79689	C4H9NO2	C00334	1.23e+06	1.20814e+06	6.09	459838	223423	84.56	2.67	1.42	0.0021645	2.66	0.0140811	1.37526	pos
5-Methyl-2-furancarboxaldehyde	M110T101	110.035	100.9	18.1761	C6H6O2	C11115	1.15654e+07	1.2529e+07	28.12	1.95719e+07	1.98849e+07	32.11	0.59	-0.76	0.0411255	1.39	0.104439	1.17248	pos
Hydroquinone	M110T981	110.019	981	10.4786	C6H6O2	C00530	1.79012e+07	1.40148e+07	94.99	5.91113e+07	6.53626e+07	31.45	0.3	-1.72	0.00865801	2.06	0.0360423	1.20494	pos
Dihydrouracil	M114T425	114.091	425.4	2.88651	C4H6N2O2	C00429	9.60639e+06	9.81964e+06	6.7	1.13925e+07	1.14837e+07	11.33	0.84	-0.25	0.025974	1.59	0.076143	1.21457	pos
Fumaric acid	M116T422	116.05	422.3	28.1707	C4H4O4	C00122	1.83079e+07	1.90106e+07	14.95	7.17909e+06	8.46797e+06	55.3	2.55	1.35	0.0021645	2.66	0.0140811	1.33185	pos
L-Proline	M116T96	116.07	95.8	1.51632	C5H9NO2	C00148	1.41681e+09	1.34257e+09	42.51	7.44597e+08	6.49275e+08	27.98	1.9	0.93	0.025974	1.59	0.076143	1.16317	pos
Styrene Oxide	M120T344	120.045	344.3	10.1603	C8H8O	C02083	1.84723e+06	1.77183e+06	49.92	5.5958e+06	6.12901e+06	53.15	0.33	-1.6	0.0411255	1.39	0.104439	1.14623	pos
Isophorone	M121T876	121.101	875.9	29.1823	C9H14O	C14743	4.56546e+06	2.40654e+06	77.47	2.10066e+07	2.15126e+07	8.99	0.22	-2.2	0.0021645	2.66	0.0140811	1.57901	pos
Niacinamide	M123T618	123.054	617.8	7.93146	C6H6N2O	C00153	1.41054e+06	929794	92.93	8.57016e+06	7.74809e+06	18.34	0.16	-2.6	0.0021645	2.66	0.0140811	1.62775	pos
Benzoate	M123T697	123.044	697.3	0.617665	C7H6O2	C00180	6.04763e+06	5.12687e+06	43.23	3.5757e+06	3.5824e+06	9.73	1.69	0.76	0.0021645	2.66	0.0140811	1.22551	pos
(2E)-Decenoyl-ACP	M130T541	130.086	541.5	0	C6H11NO2	C03969	1.87993e+06	1.97393e+06	45.85	5.62926e+06	5910773	36.52	0.33	-1.58	0.004329	2.36	0.0224946	1.31967	pos
Adipate semialdehyde	M130T571	130.065	570.9	0.0461758	C6H10O3	C06102	5.80267e+06	7.33894e+06	54.95	1.37452e+07	1.0241e+07	54.18	0.42	-1.24	0.00865801	2.06	0.0360423	1.10312	pos
2-(Methylamino)benzoic acid	M134T443	134.059	443.2	26.3614	C8H9NO2	C03005	4.9415e+08	4.77109e+08	28.68	2.49975e+08	2.62563e+08	41.17	1.98	0.98	0.00865801	2.06	0.0360423	1.29707	pos
4-Hydroxyphenylacetaldehyde	M136T327	136.062	327.1	2.43729	C8H8O2	C03765	3.95405e+06	2.53465e+06	91.9	1.28842e+07	1.35865e+07	53.58	0.31	-1.7	0.00865801	2.06	0.0360423	1.28556	pos
2-Hydroxyphenethylamine	M137T170_2	137.079	170.1	0.606793	C8H11NO	C02735	1.16289e+07	1.1824e+07	17.46	8.39263e+06	8.14206e+06	10.61	1.39	0.47	0.0151515	1.82	0.0525239	1.33528	pos
p-Aminobenzoic acid	M138T388	138.055	388.1	0.216155	C7H7NO2	C00568	1.67046e+07	1.32963e+07	51.31	4.60468e+07	5.11995e+07	29.45	0.36	-1.46	0.004329	2.36	0.0224946	1.46249	pos
Indole-3-carboxylic acid	M144T443	144.044	443.2	25.9226	C9H7NO2	C19837	1.07934e+08	1.17587e+08	43.89	1.8684e+08	1.86171e+08	22.89	0.58	-0.79	0.00865801	2.06	0.0360423	1.0448	pos
1-Naphthol	M145T560	145.065	560	0.00933262	C10H8O	C11714	4.14054e+06	5.01365e+06	40.93	9.36975e+06	9.0849e+06	14.69	0.44	-1.18	0.0021645	2.66	0.0140811	1.34831	pos
4-Guanidinobutanoic acid	M146T142	146.081	142.4	0.26991	C5H11N3O2	C01035	1.45717e+06	1.46565e+06	44.36	4.61023e+06	4.61768e+06	34.2	0.32	-1.66	0.004329	2.36	0.0224946	1.41101	pos
L-Lysine	M147T548	147.08	548	19.7213	C6H14N2O2	C00047	1.38883e+07	1.06914e+07	49.31	4.18029e+06	3.48081e+06	65.1	3.32	1.73	0.0021645	2.66	0.0140811	1.3809	pos
(2R,5S)-2,5-Diaminohexanoate	M147T845	147.116	845	19.8759	C6H14N2O2	C05161	1.33964e+07	8.26258e+06	70.81	4.75993e+07	4.6367e+07	26.23	0.28	-1.83	0.0021645	2.66	0.0140811	1.50725	pos
L-threo-3-Methylaspartate	M148T388	148.06	388.2	0.00651834	C5H9NO4	C03618	2.11172e+06	2.0472e+06	23.41	4.19624e+06	4.69966e+06	35.28	0.5	-0.99	0.0411255	1.39	0.104439	1.22371	pos
L-Glutamic acid	M148T88	148.06	87.6	1.95392	C5H9NO4	C00025	9.40703e+08	9.71455e+08	20.53	6.58693e+08	6.63764e+08	10.65	1.43	0.51	0.00865801	2.06	0.0360423	1.29036	pos
Nornicotine	M149T481	149.06	481.5	2.99598	C9H12N2	C06524	1.02019e+07	1.09352e+07	27.38	2.76686e+06	2.56927e+06	27.16	3.69	1.88	0.0021645	2.66	0.0140811	1.66157	pos
L-2-Hydroxyglutaric acid	M149T61	148.977	60.6	2.25218	C5H8O5	C03196	8.47805e+07	8.7712e+07	22.7	54611559	5.36173e+07	13.66	1.55	0.63	0.00865801	2.06	0.0360423	1.34381	pos
7-Methyladenine	M150T142	150.077	141.9	0.398741	C6H7N5	C02241	1.27798e+06	927675	97.6	4.08336e+07	3.9436e+07	58.97	0.03	-5	0.0021645	2.66	0.0140811	1.61728	pos
D-Cathinone	M150T316	150.091	315.9	1.49144	C9H11NO	C08301	4.36231e+06	4.20705e+06	60.97	7.73971e+06	7.67713e+06	3.34	0.56	-0.83	0.0021645	2.66	0.0140811	1.18038	pos
3-Methyladenine	M150T338	150.077	338.1	0.196513	C6H7N5	C00913	1.30772e+07	1.56011e+07	47.99	9.70378e+07	9.40835e+07	61.89	0.13	-2.89	0.0021645	2.66	0.0140811	1.4616	pos
L-Ribulose	M151T124	151.061	124	6.77871	C5H10O5	C00310	4.81014e+06	3.03896e+06	102.97	3.34593e+07	3.74265e+07	58.92	0.14	-2.8	0.025974	1.59	0.076143	1.25282	pos
N-Methyltyramine	M151T306	151.096	305.9	21.1785	C9H13NO	C02442	313506	143137	111.48	854451	781816	25.28	0.37	-1.45	0.025974	1.59	0.076143	1.36336	pos
Acetaminophen	M151T345	151.061	345	0.777459	C8H9NO2	C06804	2.02736e+07	2.17298e+07	50.16	5.69992e+07	5.6599e+07	35.98	0.36	-1.49	0.004329	2.36	0.0224946	1.32699	pos
(+)-(S)-Carvone	M151T467	151.112	467.4	0.661763	C10H14O	C11383	2.91621e+06	2.75106e+06	53.01	8.775e+06	7.31069e+06	43.73	0.33	-1.59	0.0021645	2.66	0.0140811	1.40486	pos
Ribitol	M152T80	152.07	80.2	7.89112	C5H12O5	C00474	5.06269e+06	5.24793e+06	41.46	1.84984e+06	1.20524e+06	87.16	2.74	1.45	0.0411255	1.39	0.104439	1.2196	pos
3-Dehydro-scyllo-inosose	M159T121	159.027	120.5	17.192	C6H8O6	C21643	2.40161e+06	2.40157e+06	6.11	2.82948e+06	2.88533e+06	9.29	0.85	-0.24	0.0151515	1.82	0.0525239	1.32455	pos
N(6)-Methyllysine	M161T876	161.132	875.7	2.06158	C7H16N2O2	C02728	2.42275e+07	2.38799e+07	10.77	3.19613e+07	3.15898e+07	17.31	0.76	-0.4	0.00865801	2.06	0.0360423	1.2779	pos
Hippuric acid	M162T485	162.055	484.6	29.2122	C9H9NO3	C01586	1.06994e+08	6.32341e+07	117.11	4.13442e+06	2.24047e+06	118.31	25.88	4.69	0.00865801	2.06	0.0360423	1.29736	pos
Isosafrole	M163T882	163.075	881.8	2.9189	C10H10O2	C10472	1.10995e+08	1.1217e+08	25.87	7.51497e+07	7.58172e+07	10.32	1.48	0.56	0.0411255	1.39	0.104439	1.24731	pos
D-Galactose	M163T99	163.06	99	25.3526	C6H12O6	C00124	1.09594e+07	1.10397e+07	18.87	7.00736e+06	6.71849e+06	26.27	1.56	0.65	0.0151515	1.82	0.0525239	1.3143	pos
L-Rhamnofuranose	M164T480	164.07	479.9	8.53295	C6H12O5	C02431	9.38313e+06	9.83927e+06	18.38	5.13939e+06	4.93825e+06	44.05	1.83	0.87	0.00865801	2.06	0.0360423	1.17826	pos
Eugenol	M165T932	165.091	932.4	3.02862	C10H12O2	C10453	2.0735e+08	1.97537e+08	17.67	2.91578e+07	2.89591e+07	4.4	7.11	2.83	0.0021645	2.66	0.0140811	1.76177	pos
Epinephrine	M166T443	166.086	443.2	25.4928	C9H13NO3	C00788	4.45323e+06	4.72201e+06	29.1	1.0196e+07	1.00784e+07	30.87	0.44	-1.2	0.004329	2.36	0.0224946	1.38378	pos
1-Methylxanthine	M166T822	166.048	821.6	2.86474	C6H6N4O2	C16358	2.59308e+07	2.74243e+07	49.21	9.41243e+07	9.10324e+07	38.07	0.28	-1.86	0.0021645	2.66	0.0140811	1.43503	pos
(R)-2-O-Sulfolactate	M170T111	169.99	110.8	7.05925	C3H6O6S	C17205	839062	780639	21.4	1.3283e+06	1.29796e+06	34.54	0.63	-0.66	0.0411255	1.39	0.104439	1.08004	pos
3,4-Dihydroxyphenylglycol	M170T442	170.06	441.7	10.5845	C8H10O4	C05576	1.02293e+07	1.10531e+07	36.12	4.88534e+06	5.56639e+06	36.91	2.09	1.07	0.0411255	1.39	0.104439	1.23968	pos
Norepinephrine	M170T61	169.976	60.7	5.75068	C8H11NO3	C00547	9.61944e+06	9.20968e+06	20.06	1.87361e+07	1.52822e+07	51.31	0.51	-0.96	0.025974	1.59	0.076143	1.10889	pos
Iminoarginine	M172T214	172.108	214.4	0.758772	C6H12N4O2	C21026	1.92952e+06	1.87257e+06	14.79	1.05844e+07	9.16043e+06	66.77	0.18	-2.46	0.0021645	2.66	0.0140811	1.48336	pos
L-Theanine	M175T212	175.108	211.5	0.708136	C7H14N2O3	C01047	3.86563e+07	3.73648e+07	18.57	2.66005e+07	2.59988e+07	17.94	1.45	0.54	0.00865801	2.06	0.0360423	1.31746	pos
5-Hydroxyconiferaldehyde	M177T675	177.055	675.4	23.9135	C10H10O4	C12204	2.1201e+07	2.29614e+07	29.05	5.39101e+06	4.64046e+06	32	3.93	1.98	0.0021645	2.66	0.0140811	1.65155	pos
2,4,6_3,5-Pentahydroxycyclohexanone	M178T508	178.05	507.7	11.7945	C6H10O6	C00691	2.58906e+06	2.65317e+06	13.07	1.95555e+06	1.99886e+06	10.64	1.32	0.4	0.0411255	1.39	0.104439	1.33086	pos
Coniferyl aldehyde	M178T80	178.058	80	25.8336	C10H10O3	C02666	5.64693e+06	5.80482e+06	20.52	3.26372e+06	3.36726e+06	50.48	1.73	0.79	0.0151515	1.82	0.0525239	1.0937	pos
beta-D-Glucosamine	M180T311	180.088	311.1	6.2414	C6H13NO5	C08349	4.14564e+06	4.44415e+06	29.13	9.26038e+06	9.06865e+06	11.48	0.45	-1.16	0.0021645	2.66	0.0140811	1.57511	pos
D-Fructose	M180T785	180.102	785	0.351163	C6H12O6	C00095	3.66626e+06	3.99986e+06	27.98	7.49707e+06	7.46867e+06	15.03	0.49	-1.03	0.0021645	2.66	0.0140811	1.51823	pos
Beta-Tyrosine	M182T313	182.067	313.2	2.85687	C9H11NO3	C04368	6.08155e+06	6.44963e+06	34.45	3.44573e+06	3.3338e+06	27.9	1.76	0.82	0.025974	1.59	0.076143	1.15761	pos
Homovanillic acid	M183T484	183.092	483.9	29.7604	C9H10O4	C05582	2.10487e+06	1.53373e+06	88.83	5.07573e+06	5.29028e+06	43.06	0.41	-1.27	0.0411255	1.39	0.104439	1.08963	pos
3-Indoleacrylate	M188T504	188.072	504	2.90462	C11H9NO2	C21283	7.16324e+06	6.27049e+06	41.65	3.14186e+06	3.52672e+06	52.79	2.28	1.19	0.00865801	2.06	0.0360423	1.10835	pos
Ibuprofen	M189T857	189.128	857.2	24.5019	C13H18O2	C01588	4.75702e+07	5.16456e+07	19.55	2.41839e+07	1.68814e+07	51.91	1.97	0.98	0.025974	1.59	0.076143	1.34376	pos
N-Alpha-acetyllysine	M189T99	189.123	99.3	3.5744	C8H16N2O3	C12989	2.08978e+07	1.24537e+07	109.93	1.23017e+08	8.9126e+07	88.9	0.17	-2.56	0.0411255	1.39	0.104439	1.1474	pos
Kynurenic acid	M190T605	190.05	604.7	1.45225	C10H7NO3	C01717	1.35827e+06	1.54374e+06	51.48	4.62201e+06	4.75841e+06	40.68	0.29	-1.77	0.004329	2.36	0.0224946	1.16092	pos
Diaminopimelic acid	M191T491	191.108	491.4	25.7663	C7H14N2O4	C00666	1.0706e+07	9.90677e+06	79.27	2.79067e+07	2.81758e+07	27.96	0.38	-1.38	0.00865801	2.06	0.0360423	1.24508	pos
N,N-Diethyl-m-toluamide	M192T402	192.138	402.4	1.95693	C12H17NO	C10935	1.66576e+07	1.73577e+07	41.73	7.03021e+06	3582770	83.84	2.37	1.24	0.025974	1.59	0.076143	1.13778	pos
Myristicin	M193T461	193.086	461.2	0.00480377	C11H12O3	C10480	5.63223e+06	5.93691e+06	21.85	3.19238e+06	3.16731e+06	47.31	1.76	0.82	0.00865801	2.06	0.0360423	1.08338	pos
Leucodopachrome	M196T100_1	196.06	99.6	1.40773	C9H9NO4	C05604	4.44178e+06	1.11792e+06	150.47	7.22091e+07	7.005e+07	53.03	0.06	-4.02	0.0021645	2.66	0.0140811	1.57631	pos
gamma-Glutamyl-beta-aminopropiononitrile	M200T351	200.091	350.6	0.949883	C8H13N3O3	C06114	1.37096e+07	1.48771e+07	17.6	7.85523e+06	8108992	15.92	1.75	0.8	0.0021645	2.66	0.0140811	1.50616	pos
Dodecanoic acid	M201T33	200.971	33.1	2.42074	C12H24O2	C02679	1.68074e+07	1.63485e+07	12.66	1.04821e+07	1.06064e+07	13.62	1.6	0.68	0.0021645	2.66	0.0140811	1.56342	pos
4-Fumarylacetoacetate	M201T629	201.054	628.7	10.5951	C8H8O6	C01061	316174	154090	118.98	2.65846e+06	2.51849e+06	78.39	0.12	-3.07	0.0151515	1.82	0.0525239	1.26662	pos
Cis-zeatin	M202T397	202.107	397.4	13.5275	C10H13N5O	C00371	2.06398e+06	1.98696e+06	15.3	5.29301e+06	5.11625e+06	37.34	0.39	-1.36	0.0021645	2.66	0.0140811	1.5249	pos
Spermine	M202T90_2	202.191	89.6	4.23147	C10H26N4	C00750	7.90424e+06	7.68597e+06	10.39	1.06258e+07	1.0508e+07	23.14	0.74	-0.43	0.0411255	1.39	0.104439	1.16381	pos
N6-(Delta2-Isopentenyl)-adenine	M203T380	203.118	379.8	2.46163	C10H13N5	C04083	344999	300194	62.59	2.42558e+06	2.37591e+06	70.55	0.14	-2.81	0.025974	1.59	0.076143	1.29991	pos
2-trans,6-trans-Farnesal	M203T782	203.179	781.7	18.3779	C15H24O	C03461	2.25863e+07	2.33906e+07	40.08	8.3377e+06	5.8147e+06	80.97	2.71	1.44	0.00865801	2.06	0.0360423	1.22845	pos
N-Acetyl-D-galactosamine	M204T174	204.086	173.9	18.2962	C8H15NO6	C01132	7.12176e+06	6.61418e+06	24.77	1.1622e+07	1.26498e+07	28.69	0.61	-0.71	0.0411255	1.39	0.104439	1.20047	pos
Aminocarb	M209T368	209.128	367.7	0.96683	C11H16N2O2	C11071	3.48142e+06	3.32958e+06	48.08	1.3344e+07	1.40545e+07	45.88	0.26	-1.94	0.0151515	1.82	0.0525239	1.37749	pos
L-Arogenate	M210T144	210.076	143.5	17.7749	C10H13NO5	C00826	4.71877e+06	1.98466e+06	133.9	2.22574e+07	2.21643e+07	15.75	0.21	-2.24	0.0021645	2.66	0.0140811	1.53075	pos
Dodecanedioic acid	M213T493	213.148	492.6	8.52785	C12H22O4	C02678	812154	421613	85.44	5.37021e+06	4.49489e+06	86.66	0.15	-2.73	0.00865801	2.06	0.0360423	1.32858	pos
L-Alanyl-D-glutamate	M218T188	218.084	187.7	27.9701	C8H14N2O5	C20957	1.11789e+07	1.15051e+07	19.7	2.5146e+07	2.58351e+07	42.28	0.44	-1.17	0.0411255	1.39	0.104439	1.22749	pos
beta-Alanyl-L-lysine	M218T325	218.158	325.4	2.11932	C9H19N3O3	C05341	7.56322e+06	7.61503e+06	34.01	1.99866e+07	1.82901e+07	40.33	0.38	-1.4	0.0021645	2.66	0.0140811	1.46358	pos
gamma-Glutamylalanine	M219T98	219.097	98.5	2.73851	C7H11N2O5R	C03740	1.90977e+07	1.96312e+07	55.37	4.23995e+07	4.08932e+07	49.66	0.45	-1.15	0.0411255	1.39	0.104439	1.02399	pos
Allocystathionine	M222T294	222.079	294.4	0.894085	C7H14N2O4S	C00542	1.88951e+06	1.46309e+06	66.68	6.63499e+06	6.74374e+06	14.67	0.28	-1.81	0.0021645	2.66	0.0140811	1.56931	pos
Traumatic Acid	M229T573	229.143	572.6	0.000368045	C12H20O4	C16308	1.01964e+06	911163	57.42	2.02145e+07	2.03906e+07	26.91	0.05	-4.31	0.0021645	2.66	0.0140811	1.71487	pos
Propazine	M230T166	230.113	166.4	0.986586	C9H16ClN5	C14312	2.2493e+06	2.2131e+06	6.03	1.76785e+06	1.75379e+06	13.99	1.27	0.35	0.004329	2.36	0.0224946	1.37772	pos
Citrinin	M233T615	233.081	614.7	16.4493	C13H14O5	C16765	246806	183396	101.62	3.64529e+06	4.0566e+06	82.92	0.07	-3.88	0.0411255	1.39	0.104439	1.10196	pos
OPEO	M233T891	233.19	890.7	16.9558	C16H26O2	D05229	5.58326e+06	5.91742e+06	47.81	1.38743e+06	1.45158e+06	67.28	4.02	2.01	0.0151515	1.82	0.0525239	1.32888	pos
Deoxyadenosine	M234T180	234.098	180.2	14.6691	C10H13N5O3	C00559	782899	817938	78.38	5.58815e+06	5.76946e+06	54.64	0.14	-2.84	0.00865801	2.06	0.0360423	1.36243	pos
Lenacil	M235T382	235.144	381.6	0.320167	C13H18N2O2	C11200	3.1045e+06	3.3069e+06	23.24	2.00357e+06	1.97742e+06	11.28	1.55	0.63	0.025974	1.59	0.076143	1.30716	pos
Carbamazepine	M237T344	237.098	343.8	19.144	C15H12N2O	C06868	4.08623e+06	3.7755e+06	37.72	7.44172e+06	8.04278e+06	29.25	0.55	-0.86	0.025974	1.59	0.076143	1.17821	pos
Ribavirin	M244T109	244.078	108.7	4.0264	C8H12N4O5	C07234	8.28721e+06	6.58139e+06	75.07	4.9866e+07	5.24898e+07	62.69	0.17	-2.59	0.00865801	2.06	0.0360423	1.38191	pos
Biotin	M245T468	245.097	468.3	4.99395	C10H16N2O3S	C00120	845409	628414	66.14	2.42903e+06	2.24424e+06	33.26	0.35	-1.52	0.004329	2.36	0.0224946	1.41177	pos
N-Acetyl-D-tryptophan	M247T373	247.129	373.3	0.755535	C13H14N2O3	C03137	2.19345e+06	1.65327e+06	75.92	1.15315e+07	1.24544e+07	55.48	0.19	-2.39	0.00865801	2.06	0.0360423	1.42234	pos
Parthenolide	M249T532	249.148	531.8	0.469863	C15H20O3	C07609	2.41126e+06	2.04633e+06	38.61	2.01348e+07	1.76316e+07	75.83	0.12	-3.06	0.0021645	2.66	0.0140811	1.4843	pos
gamma-Glutamyltyramine	M249T86	249.126	86.4	27.0312	C13H18N2O4	C20926	2.02223e+06	2.21027e+06	70.85	8.75238e+06	8.78481e+06	20.48	0.23	-2.11	0.0021645	2.66	0.0140811	1.33845	pos
Xanthoxin	M251T467	251.162	467.3	6.29941	C15H22O3	C13453	5.74513e+07	5.72862e+07	23.82	3.01031e+07	2.31313e+07	49.12	1.91	0.93	0.0151515	1.82	0.0525239	1.30473	pos
Abscisic alcohol	M251T528	251.164	528.5	0.969007	C15H22O3	C13456	2.25017e+07	2.07232e+07	25.84	1.0792e+07	1.35621e+07	59.68	2.09	1.06	0.004329	2.36	0.0224946	1.09953	pos
16-Oxopalmitate	M253T721_2	253.216	721.1	14.3514	C16H30O3	C19614	433675	328327	76.51	7.5601e+06	6.65346e+06	70.77	0.06	-4.12	0.0021645	2.66	0.0140811	1.58178	pos
Daidzein	M255T624	255.065	623.8	1.86619	C15H10O4	C10208	5.04538e+07	4.90818e+07	26.73	1.43665e+08	1.48575e+08	26.94	0.35	-1.51	0.0021645	2.66	0.0140811	1.60917	pos
16-Hydroxy hexadecanoic acid	M255T874	255.231	874.3	13.4545	C16H32O3	C18218	1.01437e+07	9.44255e+06	33.22	1.46277e+07	1.54187e+07	25.19	0.69	-0.53	0.0411255	1.39	0.104439	1.05628	pos
7,8-Dihydromonapterin	M256T216	256.092	216.3	0.104737	C9H13N5O4	C21008	1.56982e+06	1.70507e+06	35.15	1.04678e+07	9.82191e+06	83.98	0.15	-2.74	0.0411255	1.39	0.104439	1.17979	pos
5,6,7,8-Tetrahydromonapterin	M257T301	257.113	301.5	2.72254	C9H15N5O4	C21007	2.82443e+06	1.98438e+06	94.67	1.08968e+07	9.90798e+06	22.76	0.26	-1.95	0.0021645	2.66	0.0140811	1.48244	pos
2-Cyano-3,3-diphenylacrylic acid ethyl ester	M260T416	260.102	416.5	2.47876	C18H15NO2	D04101	2.82095e+06	2.81235e+06	57.24	1.21601e+07	1.03464e+07	77.44	0.23	-2.11	0.0411255	1.39	0.104439	1.15567	pos
Alpha-Linolenic acid	M261T791	261.221	791	14.6772	C18H30O2	C06427	8.97612e+07	9.03526e+07	17.16	3.79594e+07	3.97651e+07	25.38	2.36	1.24	0.0021645	2.66	0.0140811	1.61541	pos
Subaphylline	M265T500	265.154	500	0.663764	C14H20N2O3	C10497	14386923	1.4857e+07	18.84	7.26711e+06	8.16186e+06	54.37	1.98	0.99	0.0151515	1.82	0.0525239	1.1647	pos
Retinol	M269T847	269.226	846.8	1.01855	C20H30O	C00473	2.72555e+07	2.41386e+07	47.77	1.03324e+07	12351259	54.46	2.64	1.4	0.0151515	1.82	0.0525239	1.22608	pos
Estrone	M271T403	271.164	402.6	17.9077	C18H22O2	C00468	1.37492e+09	1.14478e+09	55.01	5.52336e+08	4.91394e+08	34.29	2.49	1.32	0.00865801	2.06	0.0360423	1.36111	pos
Baicalein	M271T693	271.059	692.6	3.79281	C15H10O5	C10023	2.31887e+07	1.63746e+07	95.42	7.82266e+07	7.03657e+07	56.32	0.3	-1.75	0.025974	1.59	0.076143	1.25982	pos
17a-Estradiol	M272T452	272.185	452.4	0.417713	C18H24O2	C02537	5.927e+06	4.9414e+06	40.79	9.83995e+06	1.00877e+07	17.38	0.6	-0.73	0.0411255	1.39	0.104439	1.28625	pos
Neocembrene	M272T890	272.258	889.6	26.8128	C20H32	C09140	8.40366e+07	7.1551e+07	37.07	6.97127e+06	6.45075e+06	68.37	12.05	3.59	0.0021645	2.66	0.0140811	1.64501	pos
Geranylgeraniol	M273T899	273.257	898.7	0.0876324	C20H34O	C09094	4.06847e+06	3.62063e+06	29.65	1.3681e+08	1.69797e+08	70.13	0.03	-5.07	0.0021645	2.66	0.0140811	1.53479	pos
N-Acetylmuramate	M276T217	276.107	216.7	12.7994	C11H19NO8	C02713	8.69087e+06	6.5324e+06	75.42	5.76331e+07	5.11623e+07	35.44	0.15	-2.73	0.0021645	2.66	0.0140811	1.58789	pos
Homatropine	M276T474	276.159	474	0.0230789	C16H21NO3	C07814	1.38037e+06	1.44376e+06	21.39	3.95546e+06	3.58182e+06	23.81	0.35	-1.52	0.0021645	2.66	0.0140811	1.64988	pos
Gamma-Linolenic acid	M278T453	278.185	452.9	0.916737	C18H30O2	C06426	4.50385e+06	3.28688e+06	58.47	2.37208e+07	2.06385e+07	46.66	0.19	-2.4	0.0021645	2.66	0.0140811	1.53752	pos
(9Z,11E,13E)-Octadecatrienoic acid	M279T622	279.231	622.3	1.70468	C18H30O2	C08315	1.17749e+07	8.75748e+06	66.97	4.63669e+07	4.11809e+07	39.11	0.25	-1.98	0.0021645	2.66	0.0140811	1.53296	pos
13S-hydroxyoctadecadienoic acid	M279T725	279.231	724.5	3.58126	C18H32O3	C14762	2.14513e+08	2.24443e+08	35.91	1.46278e+09	1.27909e+09	46.31	0.15	-2.77	0.0021645	2.66	0.0140811	1.63816	pos
1-(3,4-Dihydroxyphenyl)-5-hydroxy-3-decanone	M280T346	280.165	346	9.28025	C16H24O4	C17748	1.05935e+07	3.12227e+06	118.72	3.00323e+07	3.365e+07	39.26	0.35	-1.5	0.025974	1.59	0.076143	1.22486	pos
9-cis-Retinol	M286T465	286.201	464.9	2.42584	C20H30O	C16682	2.06499e+06	1.67652e+06	69.13	7.94474e+06	8.47953e+06	48.21	0.26	-1.94	0.00865801	2.06	0.0360423	1.33991	pos
11alpha,17beta-Dihydroxyandrost-4-en-3-one	M287T677	287.2	676.9	13.3496	C19H28O3	C15306	492737	489030	66.98	1.55769e+06	1.51922e+06	34.66	0.32	-1.66	0.0021645	2.66	0.0140811	1.35554	pos
Phenyllactic acid	M290T512	290.175	511.9	0.239841	C17H23NO3	C01479	1.63714e+06	1.67322e+06	21.69	4.91722e+06	4.96205e+06	18.18	0.33	-1.59	0.0021645	2.66	0.0140811	1.69187	pos
N-(L-Arginino)succinate	M291T396	291.134	396.2	13.1349	C10H18N4O6	C03406	2.95815e+06	2.97786e+06	18.02	2.15864e+06	2.05483e+06	18.08	1.37	0.45	0.0151515	1.82	0.0525239	1.18618	pos
Sclareol	M291T930	291.268	930.1	4.11992	C20H36O2	C09183	2.71114e+07	2.87945e+07	25.43	5.73349e+06	5.99832e+06	72.36	4.73	2.24	0.0021645	2.66	0.0140811	1.43265	pos
Dihydrotestosterone	M291T955	291.231	955.2	2.25319	C19H30O2	C03917	4.25691e+07	4.27812e+07	26.94	1.52235e+07	1.25265e+07	67.12	2.8	1.48	0.004329	2.36	0.0224946	1.44828	pos
N-Acetylneuraminic acid	M292T94	292.101	94.3	9.70211	C11H19NO9	C19910	7.13625e+06	2.90053e+06	138.53	1.28067e+08	5.20277e+07	131.07	0.06	-4.17	0.00865801	2.06	0.0360423	1.28367	pos
9(S)-HPOT	M293T812	293.21	811.8	2.30775	C18H30O4	C16321	3.73606e+07	3.62938e+07	26.42	1.39169e+08	1.67674e+08	39.89	0.27	-1.9	0.0411255	1.39	0.104439	1.40653	pos
Methoprene	M293T849	293.246	849.5	2.56591	C19H34O3	C14308	1.66921e+07	1.53074e+07	25.48	4.03495e+07	3.93624e+07	12.95	0.41	-1.27	0.0021645	2.66	0.0140811	1.66922	pos
9-OxoODE	M295T702	295.226	702.2	1.95105	C18H30O3	C14766	5.26928e+07	4.04315e+07	55.2	1.05371e+08	9.62608e+07	39.26	0.5	-1	0.025974	1.59	0.076143	1.12773	pos
13-L-Hydroperoxylinoleic acid	M295T876	295.226	875.7	3.04851	C18H32O4	C04717	6.00972e+07	3.94415e+07	88.05	1.80892e+08	2.12177e+08	58.19	0.33	-1.59	0.0411255	1.39	0.104439	1.0733	pos
13-OxoODE	M295T916	295.226	916.3	0.549858	C18H30O3	C14765	4.66507e+07	3.3523e+07	77.66	8.27722e+06	6.32975e+06	62.15	5.64	2.49	0.00865801	2.06	0.0360423	1.29177	pos
17a-Ethynylestradiol	M297T614	297.186	614.2	3.68117	C20H24O2	C07534	3.68522e+06	1.76514e+06	99.92	1.06676e+07	9.63285e+06	24.12	0.35	-1.53	0.025974	1.59	0.076143	1.37745	pos
3-Ketosphingosine	M298T763	298.273	763.1	2.9369	C18H35NO2	C06121	2.38139e+07	2.05197e+07	38.61	6.13128e+07	6.22375e+07	32.31	0.39	-1.36	0.004329	2.36	0.0224946	1.48108	pos
Tridemorph	M298T893	298.31	892.6	1.93088	C19H39NO	C11285	2.79002e+06	2.82291e+06	34.12	1.54575e+08	1.34247e+08	33.44	0.02	-5.79	0.0021645	2.66	0.0140811	1.75368	pos
Phytosphingosine	M300T769	300.289	768.6	11.1026	C18H39NO3	C12144	5.64177e+08	6.17122e+08	29.23	1.22831e+08	9.63807e+07	68.09	4.59	2.2	0.0021645	2.66	0.0140811	1.57814	pos
Sphingosine	M300T780	300.289	779.7	2.25116	C18H37NO2	C00319	5.54219e+08	4.54423e+08	75.96	1.11922e+09	1.14534e+09	20.02	0.5	-1.01	0.025974	1.59	0.076143	1.14792	pos
3-Dehydrosphinganine	M300T797	300.289	796.6	2.58418	C18H37NO2	C02934	3.99283e+08	3.1056e+08	51.39	3.10047e+09	2.46002e+09	42.08	0.13	-2.96	0.0021645	2.66	0.0140811	1.63639	pos
Palmitoyl ethanolamide	M300T942	300.289	941.6	2.68221	C18H37NO2	D08328	1.41144e+06	1.31809e+06	35.63	3.10808e+07	2.63265e+07	46.94	0.05	-4.46	0.0021645	2.66	0.0140811	1.73802	pos
Palmitoylethanolamide	M300T963	300.289	962.8	2.91719	C18H37NO2	C16512	1.60186e+08	1.59983e+08	23	8.13705e+08	8.50211e+08	61.89	0.2	-2.34	0.004329	2.36	0.0224946	1.42921	pos
11alpha,17beta-Dihydroxy-17-methylandrost-4-en-3-one	M301T702	301.216	701.9	13.3924	C20H30O3	C14555	5.24982e+06	5.74562e+06	50.43	2.84189e+07	2.02611e+07	74.63	0.18	-2.44	0.0021645	2.66	0.0140811	1.41061	pos
9-cis-Retinoic acid	M301T871	301.216	871.3	1.91225	C20H28O2	C15493	1.9363e+07	1.89168e+07	24.61	6.49067e+07	7.45919e+07	41.11	0.3	-1.75	0.0021645	2.66	0.0140811	1.50476	pos
Flutriafol	M302T341	302.116	341.5	19.9394	C16H13F2N3O	C18734	1.61796e+06	1.41585e+06	70.5	1.53105e+07	1.22077e+07	73	0.11	-3.24	0.025974	1.59	0.076143	1.24903	pos
Sphinganine	M302T788	302.305	787.6	1.20748	C18H39NO2	C00836	8.51089e+08	9.38352e+08	39.94	2.73034e+09	2.75163e+09	33.19	0.31	-1.68	0.0021645	2.66	0.0140811	1.40735	pos
Abietate	M303T697	303.232	697.4	0.910195	C20H30O2	C06087	1.43313e+06	1.4044e+06	11.92	3.50138e+06	3.72226e+06	29.35	0.41	-1.29	0.0021645	2.66	0.0140811	1.57328	pos
8-HETE	M303T877	303.232	877	2.63825	C20H32O3	C14776	6.20214e+06	6.23893e+06	55.8	4.40601e+07	4.39484e+07	20.8	0.14	-2.83	0.0021645	2.66	0.0140811	1.53272	pos
6'-Oxolividamine	M305T401	305.17	400.9	1.91902	C12H23N3O6	C21256	4.90252e+06	4.3117e+06	47.49	1.01461e+07	1.11564e+07	36.88	0.48	-1.05	0.025974	1.59	0.076143	1.17863	pos
Melphalan	M305T91	305.084	91.1	1.47725	C13H18Cl2N2O2	C07122	1.88477e+07	1.92602e+07	39.23	7.08981e+07	6.39375e+07	56.42	0.27	-1.91	0.025974	1.59	0.076143	1.24077	pos
dCMP	M307T477	307.207	477.4	1.05148	C9H14N3O7P	C00239	329560	219516	84.98	1.61358e+06	1.76186e+06	38.12	0.2	-2.29	0.004329	2.36	0.0224946	1.5184	pos
8,11,14-Eicosatrienoic acid	M307T906	307.226	906.1	0.69056	C20H34O2	C03242	2.33828e+07	2.60604e+07	38.56	9.07046e+06	7.40394e+06	75.07	2.58	1.37	0.025974	1.59	0.076143	1.21797	pos
Citalopram propionic acid	M311T427_1	311.105	427.2	29.8943	C18H14FNO3	C16610	3.10624e+06	3.19786e+06	36.57	1.13378e+07	1.27322e+07	52.85	0.27	-1.87	0.0411255	1.39	0.104439	1.14228	pos
Mestranol	M311T573	311.2	572.9	0.565552	C21H26O2	C07618	8.10995e+06	8.91548e+06	35.81	1.94769e+07	1.75704e+07	28.91	0.42	-1.26	0.0021645	2.66	0.0140811	1.36485	pos
Aflatoxin B1	M312T849	312.361	849.3	3.24732	C17H12O6	C06800	3.22247e+07	3.1607e+07	24.26	1.29232e+08	1.40002e+08	34.23	0.25	-2	0.004329	2.36	0.0224946	1.54447	pos
Levonorgestrel	M313T677_1	313.216	676.8	2.15826	C21H28O2	C08153	2.24242e+06	2.47364e+06	70.39	9.47295e+06	9.19917e+06	26.71	0.24	-2.08	0.0021645	2.66	0.0140811	1.39584	pos
Progesterone	M314T573	314.234	572.9	28.9593	C21H30O2	C00410	1.25155e+06	1.45091e+06	38.44	8.17437e+06	8.88298e+06	34.73	0.15	-2.71	0.0021645	2.66	0.0140811	1.61456	pos
Clomipramine	M315T369	315.166	368.6	10.788	C19H23ClN2	C06918	1.476e+07	1.37307e+07	14.91	1.19043e+07	1.13584e+07	10.57	1.24	0.31	0.0411255	1.39	0.104439	1.20645	pos
Chlorprothixene	M316T249	316.099	248.7	13.4534	C18H18ClNS	C07953	3.33805e+07	3.31688e+07	20.01	7.62664e+07	7.01381e+07	50.78	0.44	-1.19	0.0411255	1.39	0.104439	1.17676	pos
Prostaglandin B2	M317T509	317.212	509.3	15.5543	C20H30O4	C05954	3.20856e+06	3.28211e+06	18.05	6.16867e+06	6.41262e+06	10.72	0.52	-0.94	0.0021645	2.66	0.0140811	1.65123	pos
15-Deoxy-d-12,14-PGJ2	M317T654	317.21	654.4	3.70732	C20H28O3	C14717	2.53123e+06	2.58239e+06	18.51	20665771	1.69741e+07	109.33	0.12	-3.03	0.0021645	2.66	0.0140811	1.32585	pos
5a-Pregnane-3,20-dione	M317T872	317.247	871.7	2.76126	C21H32O2	C03681	3.10049e+07	3.06751e+07	17.04	2.21115e+06	1.32979e+06	99.24	14.02	3.81	0.0021645	2.66	0.0140811	1.5857	pos
Chloroquine	M320T455	320.185	455.5	12.4178	C18H26ClN3	C07625	2.61781e+06	2.08825e+06	82.09	1.28585e+07	1.26786e+07	56.63	0.2	-2.3	0.00865801	2.06	0.0360423	1.38246	pos
8,9-EET	M321T472	321.242	472.3	2.41563	C20H32O3	C14769	1.52782e+06	1.50994e+06	22	3.46635e+06	3.24798e+06	16.52	0.44	-1.18	0.0021645	2.66	0.0140811	1.63306	pos
Pregnanediol	M321T942	321.315	942.3	0.239268	C21H36O2	C05484	3.37198e+08	3.41439e+08	15.86	5.59085e+08	5.87699e+08	31.11	0.6	-0.73	0.0411255	1.39	0.104439	1.17971	pos
2'-Deamino-2'-hydroxy-6'-dehydroparomamine	M323T375	323.16	374.8	9.20402	C12H22N2O8	C20351	2.85001e+06	2.78936e+06	27.19	8.84982e+06	9.05983e+06	36.94	0.32	-1.63	0.00865801	2.06	0.0360423	1.4857	pos
Docosahexaenoic acid	M329T925	329.247	925.5	2.3569	C22H32O2	C06429	5.07209e+06	5.54726e+06	25.45	4.49679e+07	4.93551e+07	65.93	0.11	-3.15	0.0021645	2.66	0.0140811	1.51968	pos
Salutaridinol	M330T97	330.139	96.7	2.20006	C19H23NO4	C05220	2.94462e+06	3.34132e+06	60.82	1.7614e+07	1.65439e+07	68.7	0.17	-2.58	0.025974	1.59	0.076143	1.19594	pos
17alpha,21-Dihydroxypregnenolone	M331T594	331.226	593.5	10.3675	C21H32O4	C05487	2.46347e+06	2.59974e+06	56.46	8.84826e+06	1.02242e+07	37.76	0.28	-1.84	0.0151515	1.82	0.0525239	1.36553	pos
Prostaglandin J2	M334T547	334.209	547.2	16.756	C20H30O4	C05957	8.50516e+06	8.08012e+06	20.83	2.95081e+06	2.84211e+06	17.15	2.88	1.53	0.0021645	2.66	0.0140811	1.67598	pos
Isopentenyl adenosine	M336T522_1	336.164	521.7	4.89684	C15H21N5O4	C16427	769218	734875	21.56	8.48215e+06	8.3018e+06	17.25	0.09	-3.46	0.0021645	2.66	0.0140811	1.76049	pos
4-Chloro-17alpha-methyl-17beta-hydroxy-4-androsten-3-one	M337T707	337.199	707.1	17.8648	C20H29ClO2	C15358	1.69927e+07	1.75692e+07	21.8	2.16499e+06	2.18626e+06	15.4	7.85	2.97	0.0021645	2.66	0.0140811	1.74325	pos
Prostaglandin E1	M337T790	337.233	790.5	0.693881	C20H34O5	C04741	2.55637e+07	1.686e+07	83.16	5.51449e+07	4.87077e+07	46.49	0.46	-1.11	0.025974	1.59	0.076143	1.13976	pos
Linezolid	M338T412	338.159	412.5	23.7285	C16H20FN3O4	C08146	2.4174e+06	2.65961e+06	42.88	8.21087e+06	8.09433e+06	49.76	0.29	-1.76	0.025974	1.59	0.076143	1.34435	pos
Bitertanol	M338T571	338.179	570.7	22.6981	C20H23N3O2	C11258	660245	698367	69.43	1.25019e+06	1.08716e+06	31.17	0.53	-0.92	0.025974	1.59	0.076143	1.03084	pos
11,12-DiHETrE	M339T610	339.252	609.5	1.69785	C20H34O4	C14774	7.51712e+06	7.16188e+06	29	1.34183e+07	1.22617e+07	28.53	0.56	-0.84	0.00865801	2.06	0.0360423	1.306	pos
8,9-DiHETrE	M339T681	339.252	681.3	1.40308	C20H34O4	C14773	1.54943e+06	1.47919e+06	26.71	5.81915e+06	6.55372e+06	46.1	0.27	-1.91	0.004329	2.36	0.0224946	1.45405	pos
Norethindrone acetate	M341T775	341.213	775	6.51796	C22H28O3	C08152	2.14628e+07	2.26919e+07	26.22	8.21481e+06	1.03297e+07	62.74	2.61	1.39	0.0021645	2.66	0.0140811	1.21581	pos
11b,21-Dihydroxy-3,20-oxo-5b-pregnan-18-al	M345T329	345.195	329.1	20.7589	C21H30O5	C05473	2.47466e+06	2.51622e+06	17.36	1.60022e+06	1.55265e+06	14.25	1.55	0.63	0.004329	2.36	0.0224946	1.42726	pos
Cortisol	M345T603	345.205	603	9.65802	C21H30O5	C00735	1.03364e+07	1.06283e+07	20.86	3.76926e+07	3.32081e+07	34.85	0.27	-1.87	0.0021645	2.66	0.0140811	1.64943	pos
Himbacine	M346T716	346.277	716.4	7.86654	C22H35NO2	C10598	2.99358e+06	3.05031e+06	37.12	7.45628e+06	8.00502e+06	18.26	0.4	-1.32	0.0021645	2.66	0.0140811	1.55538	pos
N-Acetylmuramoyl-Ala	M347T325	347.144	325.3	9.60417	C14H24N2O9	C02999	273514	268579	53.86	1.113e+07	3.47503e+06	150.08	0.02	-5.35	0.00865801	2.06	0.0360423	1.20806	pos
Corticosterone	M347T574	347.221	574	0.794882	C21H30O4	C02140	1.13945e+07	1.24601e+07	41.67	3.77808e+07	3.19831e+07	39.7	0.3	-1.73	0.0021645	2.66	0.0140811	1.3879	pos
(10S)-Juvenile hormone III diol phosphate	M347T640	347.149	640.3	24.0986	C16H29O7P	C16507	326131	155133	138.03	1.64288e+06	1.7016e+06	55.93	0.2	-2.33	0.0411255	1.39	0.104439	1.19968	pos
4-Chloroprogesterone	M349T729	349.199	729.1	18.6831	C21H29ClO2	C14676	1.48328e+06	1.5445e+06	24.89	6.21072e+06	5.5476e+06	40.09	0.24	-2.07	0.0021645	2.66	0.0140811	1.64703	pos
Enalaprilat	M349T959	349.182	959.2	13.9492	C18H24N2O5	C11720	8.22473e+06	8.18843e+06	42.17	1.97126e+07	1.84308e+07	28.04	0.42	-1.26	0.0021645	2.66	0.0140811	1.43174	pos
Misoprostol	M351T847	351.252	847.3	1.23669	C21H36O5	C07227	1.886e+08	1.86991e+08	29.25	3.13565e+07	3.03086e+07	22.15	6.01	2.59	0.0021645	2.66	0.0140811	1.71724	pos
Prostaglandin I2	M353T579	353.232	579	1.91376	C20H32O5	C01312	1.31287e+07	1.27488e+07	31.71	6.20641e+06	6.14855e+06	38.39	2.12	1.08	0.00865801	2.06	0.0360423	1.34544	pos
(4Z,7Z,10Z,13Z,16Z,19Z)-Docosahexaenoic acid ethyl ester	M357T937	357.278	936.8	1.61219	C24H36O2	C16185	9.36463e+07	9.24098e+07	25.76	2.66227e+08	2.76365e+08	42.72	0.35	-1.51	0.0411255	1.39	0.104439	1.26781	pos
Nalbuphine	M358T628	358.204	627.5	7.32549	C21H27NO4	C07251	678756	472646	93.44	7.5762e+06	5.76858e+06	76.52	0.09	-3.48	0.0151515	1.82	0.0525239	1.35118	pos
Prednisone	M359T684	359.188	683.7	6.12493	C21H26O5	C07370	1.51264e+06	1.28399e+06	93.74	1.08981e+07	9.26364e+06	77.41	0.14	-2.85	0.0151515	1.82	0.0525239	1.2856	pos
Rosmarinic acid	M360T463	360.238	463.3	2.75385	C18H16O8	C01850	274931	274841	17.53	1.11032e+07	1.13282e+07	36.24	0.02	-5.34	0.0021645	2.66	0.0140811	1.74448	pos
Nitrendipine	M361T495	361.139	494.7	0.0019133	C18H20N2O6	C07713	1.1361e+06	484244	112.19	8.31649e+06	5.19725e+06	93.91	0.14	-2.87	0.0151515	1.82	0.0525239	1.267	pos
1-Arachidonoylglycerol	M361T828	361.272	827.9	1.09513	C23H38O4	C13857	1.77172e+06	1.5605e+06	59.26	1.25195e+07	1.25659e+07	57.86	0.14	-2.82	0.00865801	2.06	0.0360423	1.45824	pos
Lacto-N-biose I	M366T96	366.138	95.6	7.19401	C14H25NO11	C06372	5.43476e+07	4.73216e+07	57.01	2.50309e+08	1.25555e+08	92.39	0.22	-2.2	0.00865801	2.06	0.0360423	1.25807	pos
N-Acetylbialaphos	M366T976	366.139	976.4	10.5862	C13H24N3O7P	C17951	1.81289e+06	1.05276e+06	90.22	1.6728e+07	1.22913e+07	68.26	0.11	-3.21	0.0021645	2.66	0.0140811	1.53556	pos
Cholesterol	M369T819	369.351	818.9	2.9782	C27H46O	C00187	5.33907e+07	5.43798e+07	12.17	1.1759e+07	1.12863e+07	31.53	4.54	2.18	0.0021645	2.66	0.0140811	1.70542	pos
Riboflavin	M377T453	377.145	452.7	1.39242	C17H20N4O6	C00255	2.10601e+07	1.74878e+07	84.08	1.13672e+08	8.3155e+07	85.44	0.19	-2.43	0.00865801	2.06	0.0360423	1.25636	pos
Vitamin D3	M385T935	385.346	934.7	1.75427	C27H44O	C05443	1.71901e+06	1.67412e+06	80.25	2.32465e+07	1.83803e+07	52.77	0.07	-3.76	0.0021645	2.66	0.0140811	1.55259	pos
Lovastatin	M387T780	387.252	779.9	8.8676	C24H36O5	C07074	1.20123e+07	1.1261e+07	45.33	2.12577e+07	2.28245e+07	19.6	0.57	-0.82	0.0151515	1.82	0.0525239	1.2385	pos
Allocholic acid	M391T770	391.283	770.3	6.47614	C24H40O5	C00695	3.26886e+07	3.09933e+07	53.79	8.0615e+07	6.47603e+07	69.02	0.41	-1.3	0.025974	1.59	0.076143	1.09625	pos
S-Hexyl-glutathione	M391T917	391.283	916.6	1.81753	C16H29N3O6S	C02886	1.98666e+07	1.88734e+07	60.75	7.93208e+07	7.4339e+07	18.74	0.25	-2	0.0021645	2.66	0.0140811	1.53795	pos
4-Methylamino-4-de(dimethylamino)anhydrotetracycline	M395T337	395.129	336.5	23.3696	C21H20N2O7	C21436	569937	268788	95.3	5.86809e+06	4.07181e+06	107.44	0.1	-3.36	0.025974	1.59	0.076143	1.18335	pos
alpha-Spinasterol	M395T887	395.366	887.2	3.54102	C29H48O	C08840	2.75695e+07	2.26113e+07	54.97	9.83202e+07	1.05382e+08	43.32	0.28	-1.83	0.004329	2.36	0.0224946	1.43725	pos
14alpha-Hydroxy-5beta-cholest-7-ene-3,6-dione	M397T687	397.304	687.2	5.20005	C27H42O3	C16509	1.79516e+07	1.99327e+07	38.06	4.56709e+07	3.69243e+07	50.99	0.39	-1.35	0.0021645	2.66	0.0140811	1.34185	pos
beta-Sitosterol	M397T906	397.381	905.7	5.78789	C29H50O	C01753	6.48732e+08	6.78314e+08	22.23	2.92418e+08	2.51287e+08	63.03	2.22	1.15	0.0151515	1.82	0.0525239	1.33642	pos
3 alpha,7 alpha,26-Trihydroxy-5beta-cholestane	M403T735	403.348	734.9	12.0639	C27H48O3	C05444	4.38748e+07	4.31053e+07	12.67	6.7232e+06	6.73566e+06	23.04	6.53	2.71	0.0021645	2.66	0.0140811	1.744	pos
Cortisol 21-acetate	M405T568	405.227	567.7	1.42143	C23H32O6	C02821	127662	79500.3	83.8	3.00539e+06	2.76769e+06	38.7	0.04	-4.56	0.0021645	2.66	0.0140811	1.71286	pos
5-Dehydroavenasterol	M411T885	411.363	884.8	1.27382	C29H46O	C15783	2.18534e+08	1.60421e+08	91.11	7.51519e+07	7.50991e+07	23.43	2.91	1.54	0.025974	1.59	0.076143	1.09228	pos
3beta,5beta-Ketotriol	M415T728	415.319	727.8	6.58293	C27H44O4	C16494	5.73903e+06	6.27014e+06	29.22	1.24658e+07	1.1485e+07	27.05	0.46	-1.12	0.0021645	2.66	0.0140811	1.3979	pos
3-Dehydro-6-deoxoteasterone	M415T767	415.349	767.2	8.58547	C28H48O3	C15800	2.43822e+06	2.11961e+06	28.41	5.06527e+06	4.82693e+06	40.54	0.48	-1.05	0.004329	2.36	0.0224946	1.3416	pos
Sodium deoxycholate	M415T809	415.211	808.7	1.25606	C24H39O4. Na	C11171	4.11045e+07	1.28234e+07	174.7	2.08412e+08	1.79116e+08	92.07	0.2	-2.34	0.0151515	1.82	0.0525239	1.14992	pos
Taraxerol	M427T915	427.356	915.3	1.07289	C30H50O	C08637	1.08502e+08	1.04605e+08	16.48	3.36576e+08	2.51466e+08	63.55	0.32	-1.63	0.004329	2.36	0.0224946	1.32445	pos
Mifepristone	M429T735	429.26	735.3	0.585812	C29H35NO2	C07652	2.19645e+06	1.38333e+06	98.26	1.13718e+07	1.25382e+07	36.98	0.19	-2.37	0.004329	2.36	0.0224946	1.50194	pos
3-Dehydro-2-deoxyecdysone	M429T802	429.298	801.5	6.13563	C27H42O5	C16497	4.56914e+06	2.20082e+06	125.2	1.35546e+07	1.22407e+07	42.94	0.34	-1.57	0.025974	1.59	0.076143	1.35391	pos
alpha-Tocopherol	M430T536	430.243	536.1	0.666647	C29H50O2	C02477	5.11835e+06	5.40347e+06	19.98	9.3061e+07	9.32376e+07	20.03	0.06	-4.18	0.0021645	2.66	0.0140811	1.76079	pos
Hecogenin	M431T710	431.315	710	0.0406153	C27H42O4	C08902	1.08256e+07	9.37701e+06	67.22	2.54589e+07	2.47296e+07	51.6	0.43	-1.23	0.0411255	1.39	0.104439	1.02995	pos
Digitogenin	M431T739	431.315	738.9	8.42547	C27H44O5	C08896	8.69291e+06	7.72162e+06	73.17	2.1289e+07	2.29727e+07	32.27	0.41	-1.29	0.025974	1.59	0.076143	1.22287	pos
Gentamicin C1a	M432T461	432.287	461.2	22.9801	C19H39N5O7	C00908	2.07776e+06	1.66561e+06	33.23	3.63889e+06	3.6994e+06	25	0.57	-0.81	0.025974	1.59	0.076143	1.31698	pos
27-Deoxy-5b-cyprinol	M437T936	437.361	936.3	4.28935	C27H48O4	C05446	3.43339e+07	3.27924e+07	50.86	667520	382049	113.8	51.44	5.68	0.0021645	2.66	0.0140811	1.68795	pos
Deoxytubulosine	M442T641	442.292	641	24.0435	C29H37N3O2	C11817	1.25548e+07	1.302e+07	25.19	2.792e+07	2.74949e+07	10.74	0.45	-1.15	0.0021645	2.66	0.0140811	1.62912	pos
Soyasapogenol B	M459T823_2	459.349	823.2	28.5476	C30H50O3	C08980	3.76973e+07	2.44565e+07	66.42	1.31435e+08	1.44955e+08	52.22	0.29	-1.8	0.025974	1.59	0.076143	1.31123	pos
Galactosylsphingosine	M461T903	461.324	903.2	24.4941	C24H47NO7	C01747	1.48757e+06	982754	69.37	1.14571e+07	1.06142e+07	41.91	0.13	-2.95	0.0021645	2.66	0.0140811	1.64897	pos
Brassinolide	M463T827	463.341	827.3	6.5481	C28H48O6	C11049	3.11252e+07	3.28816e+07	33.85	9.03992e+06	4.91243e+06	107.57	3.44	1.78	0.00865801	2.06	0.0360423	1.28844	pos
Lithocholyltaurine	M466T595	466.29	595.1	9.36327	C26H45NO5S	C02592	9.32319e+06	7.28229e+06	88.76	4.24883e+07	4.79397e+07	37.17	0.22	-2.19	0.004329	2.36	0.0224946	1.40083	pos
Oxethazaine	M468T573_2	468.31	572.7	26.2134	C28H41N3O3	C12552	1.8116e+07	12674415	108.56	1.16133e+08	1.05028e+08	47.79	0.16	-2.68	0.0021645	2.66	0.0140811	1.5353	pos
26-Hydroxyecdysone	M480T664	480.278	664	0.073566	C27H44O7	C16499	3.05339e+07	3.04656e+07	15.08	1.38128e+07	1.27945e+07	25.33	2.21	1.14	0.0021645	2.66	0.0140811	1.60154	pos
Antibiotic JI-20A	M482T748	482.326	747.9	3.70539	C19H39N5O9	C17704	1.27272e+09	1.13923e+09	49.7	1.27326e+08	8.57182e+07	76.58	10	3.32	0.0021645	2.66	0.0140811	1.61724	pos
1-palmitoylglycerophosphocholine	M496T876_1	496.337	875.8	6.64872	C24H51NO7P	C04102	1.55696e+10	1.37746e+10	51.19	3.28545e+09	2.65041e+09	66.28	4.74	2.24	0.004329	2.36	0.0224946	1.53401	pos
Taurodeoxycholic acid	M499T759	499.303	758.8	11.8166	C26H45NO6S	C05463	1.39243e+07	1.60402e+07	38.69	4.28759e+07	3.26323e+07	59.38	0.32	-1.62	0.0021645	2.66	0.0140811	1.35565	pos
Protoporphyrin IX	M563T840	563.261	840.3	7.94659	C34H34N4O4	C02191	3.15107e+06	1.59915e+06	101.93	1.27322e+07	9.79795e+06	58.89	0.25	-2.01	0.00865801	2.06	0.0360423	1.34345	pos
Bilirubin	M584T924	584.26	924.1	5.64817	C33H36N4O6	C00486	2.30467e+07	2.75142e+07	58.44	1.40769e+08	1.30483e+08	32.22	0.16	-2.61	0.0021645	2.66	0.0140811	1.20028	pos
Mesobilirubinogen	M593T708_2	593.335	708.4	3.24269	C33H44N4O6	C05790	1.83757e+07	1.51134e+07	73.82	7.31915e+07	5.8738e+07	75.53	0.25	-1.99	0.00865801	2.06	0.0360423	1.35288	pos
o-Cresol	M107T474	107.049	474	13.0781	C7H8O	C01542	143960	144215	9.3	116767	122463	17.38	1.23	0.3	0.00865801	2.06	0.0379119	1.10067	neg
Methylmalonic acid	M117T738	116.927	737.6	5.13217	C4H6O4	C02170	6.96872e+07	8.25622e+07	57.26	1.46567e+07	1.1986e+07	66.08	4.75	2.25	0.00865801	2.06	0.0379119	1.35661	neg
L-Threonine	M118T90	118.049	89.9	1.96914	C4H9NO3	C00188	7.05835e+07	6.09034e+07	52.35	1.74132e+07	1.62735e+07	75.1	4.05	2.02	0.0021645	2.66	0.0169225	1.35894	neg
Phenylethylamine	M121T987	121.027	987.4	7.23946	C8H11N	C05332	2.44243e+07	2.05706e+07	39.74	4.42907e+06	4.20779e+06	88.3	5.51	2.46	0.0021645	2.66	0.0169225	1.41838	neg
Imidazoleacetic acid	M125T240	125.034	239.8	14.5881	C5H6N2O2	C02835	1.73517e+07	1.77854e+07	24.08	6.5775e+07	6.36561e+07	42.41	0.26	-1.92	0.0021645	2.66	0.0169225	1.60861	neg
Ketoleucine	M129T319_2	129.054	319	17.1881	C6H10O3	C00233	7.00206e+07	5.88739e+07	47.94	2.01332e+08	2.06826e+08	46.84	0.35	-1.52	0.0411255	1.39	0.107548	1.27815	neg
Leucine	M130T158_2	130.086	157.6	4.58851	C6H13NO2	C16439	1.38567e+08	1.67035e+08	70.03	2.63854e+07	1.74992e+07	82.16	5.25	2.39	0.025974	1.59	0.0791314	1.20693	neg
L-Malic acid	M133T73	133.013	73.4	0.431175	C4H6O5	C00149	1.27501e+08	1.4006e+08	36.91	3.16045e+07	2.54334e+07	43.62	4.03	2.01	0.0021645	2.66	0.0169225	1.59538	neg
o-Toluate	M135T156	135.044	155.6	6.1017	C8H8O2	C07215	7.73731e+06	7.37743e+06	30.07	2.23467e+06	1.96084e+06	74.86	3.46	1.79	0.0021645	2.66	0.0169225	1.39151	neg
Salicylic acid	M137T371	137.024	371.2	1.92314	C7H6O3	C00805	2.51358e+07	2.55564e+07	54.44	5.34215e+06	617580	140.28	4.71	2.23	0.025974	1.59	0.0791314	1.29747	neg
Dimethylbenzimidazole	M145T307	145.04	307.1	1.40216	C9H10N2	C03114	8.47312e+06	8.3865e+06	9.45	1.69528e+07	1.19339e+07	50.48	0.5	-1	0.0021645	2.66	0.0169225	1.27593	neg
Oxoglutaric acid	M145T75	145.013	75.4	0.811338	C5H6O5	C00026	1.98236e+06	1.92838e+06	9.06	1.97583e+07	2.14299e+07	44.36	0.1	-3.32	0.0021645	2.66	0.0169225	1.56275	neg
2-Carboxybenzaldehyde	M149T366	149.024	365.9	1.50311	C8H6O3	C03057	2.98372e+06	2.44476e+06	68.39	5.81154e+06	5.14615e+06	45.02	0.51	-0.96	0.025974	1.59	0.0791314	1.10533	neg
D-Xylose	M149T93	149.044	92.8	4.50151	C5H10O5	C00181	1.82113e+07	1.67371e+07	35.9	4.59027e+07	5.04293e+07	40.57	0.4	-1.33	0.025974	1.59	0.0791314	1.31893	neg
p-Hydroxyphenylacetic acid	M151T154	151.038	153.7	10.7522	C8H8O3	C00642	1.02053e+07	9.25171e+06	21	4.38883e+06	4.71902e+06	18.67	2.33	1.22	0.0021645	2.66	0.0169225	1.61447	neg
Oxoadipic acid	M159T111	158.977	110.6	0.272062	C6H8O5	C00322	7.73042e+06	6.53405e+06	62.11	3.49739e+08	336826341	86.29	0.02	-5.5	0.004329	2.36	0.024604	1.46901	neg
(R)-3,3-Dimethylmalate	M162T327	162.054	326.8	6.78791	C6H10O5	C01088	1.99435e+06	1.78758e+06	47.86	411059	213224	117.53	4.85	2.28	0.004329	2.36	0.024604	1.51266	neg
Phenylpyruvic acid	M163T399	163.04	399.3	1.3739	C9H8O3	C00166	9.92973e+06	1.05356e+07	26.41	5.04506e+06	5.4382e+06	18.32	1.97	0.98	0.004329	2.36	0.024604	1.45324	neg
Sorbitol	M163T84	163.06	84	0.674596	C6H14O6	C00794	1.15384e+07	1.0998e+07	33.87	1.6125e+07	1.60851e+07	15.45	0.72	-0.48	0.0411255	1.39	0.107548	1.18272	neg
L-Methionine (R)-S-oxide	M164T226	164.036	225.9	17.8251	C5H11NO3S	C15998	293759	311036	16.13	1.02563e+06	1.01715e+06	18.38	0.29	-1.8	0.0021645	2.66	0.0169225	1.71791	neg
Phthalic acid	M165T371	165.039	371.1	4.4781	C8H6O4	C01606	1.12556e+07	9.29678e+06	41.5	2.04618e+06	1.42092e+06	104.88	5.5	2.46	0.0021645	2.66	0.0169225	1.34929	neg
3,4-Dihydroxybenzeneacetic acid	M167T146	167.036	146	7.04039	C8H8O4	C01161	1.45568e+07	1.15382e+07	53.41	2.68154e+06	2.22693e+06	91.68	5.43	2.44	0.0021645	2.66	0.0169225	1.49206	neg
Homogentisic acid	M167T182	167.035	181.7	1.19736	C8H8O4	C00544	2.37087e+06	2.41827e+06	29.71	3.97432e+06	3.66313e+06	21.59	0.6	-0.75	0.004329	2.36	0.024604	1.32202	neg
Uric acid	M167T97	167.02	97.3	3.14007	C5H4N4O3	C00366	1.47012e+07	1.20744e+07	34.57	4.31898e+07	4.63881e+07	37.51	0.34	-1.55	0.00865801	2.06	0.0379119	1.39373	neg
Suberic acid	M173T99	173.08	99.2	2.87614	C8H14O4	C08278	3.34894e+07	1.79073e+07	100.17	1.07135e+07	9.45784e+06	64.17	3.13	1.64	0.025974	1.59	0.0791314	1.04723	neg
N-Acetyl-L-aspartic acid	M174T80_1	174.04	79.7	2.41552	C6H9NO5	C01042	8.34591e+06	9.31498e+06	41.38	2.87551e+07	2.84947e+07	46.6	0.29	-1.78	0.025974	1.59	0.0791314	1.32384	neg
Gluconic acid	M177T83	177.038	82.6	8.52922	C6H12O7	C00257	5.79057e+07	5.89797e+07	16.53	2.32772e+07	1.13773e+07	93.9	2.49	1.31	0.00865801	2.06	0.0379119	1.27924	neg
Aesculetin	M178T325	178.026	325.1	4.49373	C9H6O4	C09263	2.58855e+07	2.82321e+07	36.83	6.22358e+06	4.98401e+06	46.1	4.16	2.06	0.0021645	2.66	0.0169225	1.59583	neg
Caffeate	M179T327	179.032	326.5	11.7705	C9H8O4	C01197	6.8235e+06	6.38752e+06	17.62	3.21519e+06	3.48057e+06	26.91	2.12	1.09	0.0021645	2.66	0.0169225	1.48528	neg
Theobromine	M180T505	180.065	505	4.44283	C7H8N4O2	C07480	1.70107e+06	1.69982e+06	21.62	395388	252833	120.28	4.3	2.11	0.0021645	2.66	0.0169225	1.24077	neg
Psoralen	M185T441_1	185.027	441.1	12.8414	C11H6O3	C09305	1.12083e+06	1.04829e+06	21.94	1.71142e+06	1.71141e+06	25.81	0.65	-0.61	0.025974	1.59	0.0791314	1.23788	neg
N-Acetyl-L-glutamine	M187T96	187.071	95.7	6.57977	C7H12N2O4	D07063	1.31204e+06	1.22534e+06	76.29	6.39974e+06	6.10778e+06	71.77	0.21	-2.29	0.025974	1.59	0.0791314	1.27868	neg
Xanthoxylin	M195T437	195.068	437	7.05396	C10H12O4	C10726	1.95489e+06	1.39817e+06	70.68	497666	643081	76.19	3.93	1.97	0.0021645	2.66	0.0169225	1.10803	neg
Nitrofurazone	M198T219	198.04	218.7	3.0297	C6H6N4O4	C08042	2.38601e+06	2.46434e+06	11.09	1.35545e+07	1.4725e+07	41.45	0.18	-2.51	0.0021645	2.66	0.0169225	1.62951	neg
N-Acetylserotonin	M199T880	199.169	879.7	0.149285	C12H14N2O2	C00978	7.50821e+06	6.98782e+06	52.32	2.27347e+07	2.09814e+07	58.01	0.33	-1.6	0.0411255	1.39	0.107548	1.04279	neg
Xanthurenic acid	M204T324	204.029	324.3	0.682141	C10H7NO4	C02470	3.41103e+06	3.70864e+06	40.78	1.36772e+06	981792	64.25	2.49	1.32	0.0151515	1.82	0.054815	1.29511	neg
N-Acetyl-L-phenylalanine	M206T385	206.081	385.1	0.897846	C11H13NO3	C03519	1.38114e+06	1.36899e+06	49.65	2.69742e+06	2.59925e+06	28.06	0.51	-0.97	0.00865801	2.06	0.0379119	1.18019	neg
Genipin	M207T416	207.069	416.3	16.3713	C11H14O5	C09780	924515	877540	30.07	3.60058e+06	2.92918e+06	50.53	0.26	-1.96	0.0021645	2.66	0.0169225	1.5643	neg
3-(3,4-Dihydroxy-5-methoxy)-2-propenoic acid	M209T324	209.045	324.4	3.82693	C10H10O5	C05619	142875	88604.7	106.49	2.38151e+06	2.06212e+06	45.55	0.06	-4.06	0.0021645	2.66	0.0169225	1.69086	neg
Sedoheptulose	M209T91	209.066	91.4	3.82654	C7H14O7	C02076	1.4809e+07	1.56973e+07	28.49	3.05968e+07	3.36477e+07	36.31	0.48	-1.05	0.0151515	1.82	0.054815	1.29518	neg
Methyldopa	M211T810	211.133	809.9	1.92038	C10H13NO4	C07194	2.09234e+06	1.92186e+06	31.38	6.35154e+06	6.52578e+06	19.53	0.33	-1.6	0.0021645	2.66	0.0169225	1.65498	neg
Pantothenic acid	M218T150	218.103	150.4	1.3005	C9H17NO5	C00864	1.07322e+08	1.05392e+08	18.21	3.84066e+07	4.18167e+07	46.02	2.79	1.48	0.0021645	2.66	0.0169225	1.45814	neg
Equol	M241T697	241.087	697	0.730026	C15H14O3	C14131	2.30928e+06	2.03584e+06	35.53	683021	604887	81.74	3.38	1.76	0.0021645	2.66	0.0169225	1.31887	neg
Pseudouridine	M243T145	243.062	144.7	2.56725	C9H12N2O6	C02067	3.4335e+07	3.37212e+07	41.07	8.02123e+07	6.98897e+07	31.63	0.43	-1.22	0.0021645	2.66	0.0169225	1.46285	neg
Pyridoxal phosphate	M247T361	247.028	361.2	10.5251	C8H10NO6P	C00018	1.06198e+06	1.12095e+06	55.6	2.05337e+06	1.96452e+06	26.78	0.52	-0.95	0.00865801	2.06	0.0379119	1.00982	neg
Deoxyinosine	M251T302_2	251.078	302.2	3.18626	C10H12N4O4	C05512	9.51241e+07	4.86986e+07	112.82	5.11973e+08	5.16849e+08	68.74	0.19	-2.43	0.00865801	2.06	0.0379119	1.40432	neg
5,7-Dihydroxyflavone	M253T719	253.05	719	1.92322	C15H10O4	C10028	722546	782589	25.29	1.44591e+06	1.36804e+06	46.71	0.5	-1	0.025974	1.59	0.0791314	1.12581	neg
(2S)-Liquiritigenin	M255T439_1	255.066	439.5	0.746293	C15H12O4	C09762	653698	650222	10.51	993519	991379	7.52	0.66	-0.6	0.0021645	2.66	0.0169225	1.63701	neg
Palmitic acid	M255T967	255.232	966.9	2.09808	C16H32O2	C00249	4.77899e+08	4.98911e+08	52.85	6.9122e+07	3.23994e+07	131.84	6.91	2.79	0.00865801	2.06	0.0379119	1.44121	neg
Glucose 6-phosphate	M259T75	259.025	75.4	9.17287	C6H13O9P	C00092	2.01505e+06	2.13265e+06	46.39	7.32285e+06	4.44288e+06	92.97	0.28	-1.86	0.025974	1.59	0.0791314	1.0374	neg
Deoxyguanosine	M266T308_2	266.089	308.4	1.13113	C10H13N5O4	C00330	1.50302e+07	1.26716e+07	29.41	1.50535e+08	1.66732e+08	44.54	0.1	-3.32	0.0021645	2.66	0.0169225	1.59524	neg
Inosine	M267T270	267.073	269.6	0.763719	C10H12N4O5	C00294	8.55493e+06	8.02195e+06	63.24	2.53698e+08	221344386	42.16	0.03	-4.89	0.0021645	2.66	0.0169225	1.72275	neg
Naringenin	M271T550	271.061	550.1	1.84461	C15H12O5	C00509	1.16096e+06	1.20614e+06	18.08	3.58543e+06	3.63111e+06	44.39	0.32	-1.63	0.0021645	2.66	0.0169225	1.47536	neg
Dibutyl phthalate	M277T686	277.144	686.5	0.808243	C16H22O4	C14214	2.89315e+06	2.85112e+06	32.01	1.00267e+06	479993	152.17	2.89	1.53	0.0411255	1.39	0.107548	1.24912	neg
Bovinic acid	M279T778	279.233	778.3	1.51845	C18H32O2	C04056	1.52953e+06	1.0452e+06	82.64	8.47011e+06	9.17465e+06	32.61	0.18	-2.47	0.0021645	2.66	0.0169225	1.58652	neg
Glycitein	M283T624	283.06	623.9	2.47297	C16H12O5	C14536	1.35478e+07	7.81743e+06	67.2	4.26818e+07	3.90699e+07	46.91	0.32	-1.66	0.00865801	2.06	0.0379119	1.42598	neg
Rhein	M283T718	283.024	718.4	1.41331	C15H8O6	C10401	437295	464522	31.94	1.2446e+06	1.06096e+06	56.65	0.35	-1.51	0.00865801	2.06	0.0379119	1.43867	neg
Biochanin A	M283T781	283.061	780.6	2.11969	C16H12O5	C00814	1291433	1.2243e+06	27.3	2.18696e+06	1.98566e+06	30.2	0.59	-0.76	0.0151515	1.82	0.054815	1.23859	neg
Luteolin	M285T407	285.17	407.2	6.70635	C15H10O6	C01514	1.25224e+06	873696	72.29	1.00478e+07	1.2383e+07	52.74	0.12	-3	0.00865801	2.06	0.0379119	1.45582	neg
Hexadecanedioate	M285T693	285.207	693.3	2.18789	C16H30O4	C19615	1.59964e+07	1.53621e+07	40.63	4.43822e+06	3.76727e+06	105.84	3.6	1.85	0.00865801	2.06	0.0379119	1.16313	neg
Epicatechin	M289T473	289.075	472.5	9.81695	C15H14O6	C09727	266476	242995	27.21	4.42949e+06	3.91586e+06	41.86	0.06	-4.06	0.0021645	2.66	0.0169225	1.74119	neg
Gingerol	M293T695	293.176	695.4	0.764047	C17H26O4	C10462	4.67389e+06	4.42043e+06	39.49	567985	115306	200.05	8.23	3.04	0.004329	2.36	0.024604	1.54043	neg
N4-Acetylsulfamethoxazole	M295T80	295.06	79.7	10.8453	C12H13N3O4S	C13061	1.30991e+06	1.42572e+06	25.9	2.61827e+06	2.27761e+06	37.37	0.5	-1	0.0021645	2.66	0.0169225	1.39307	neg
all-trans-Retinoic acid	M299T962	299.258	962.4	1.73623	C20H28O2	C00777	8.63023e+08	6.0718e+08	63.04	4.22018e+08	2.57038e+08	118.56	2.04	1.03	0.0411255	1.39	0.107548	1.03908	neg
9,10-12,13-Diepoxyoctadecanoate	M312T710	312.226	709.9	13.7719	C18H32O4	C14836	2.38265e+06	2.43932e+06	18.52	1.00791e+07	7.74082e+06	71.12	0.24	-2.08	0.004329	2.36	0.024604	1.43872	neg
Docosapentaenoic acid (22n-3)	M329T794	329.248	794.3	0.911166	C22H34O2	C16513	2.41518e+08	1.35948e+08	116.06	4.15593e+09	3.89824e+09	53.69	0.06	-4.1	0.0021645	2.66	0.0169225	1.64161	neg
Cellobiose	M341T143_2	341.108	143.2	0.852951	C12H22O11	C00185	296104	296880	51.23	1.33413e+06	1.36281e+06	20.75	0.22	-2.17	0.0021645	2.66	0.0169225	1.6251	neg
Trehalose	M341T440	341.111	440	6.05221	C12H22O11	C01083	1.46726e+06	1.52329e+06	61.93	3.65429e+06	3.10948e+06	42.33	0.4	-1.32	0.00865801	2.06	0.0379119	1.25087	neg
Prostaglandin E3	M349T493	349.201	492.8	2.86368	C20H30O5	C06439	3.60379e+07	3.77967e+07	22.99	5.68834e+06	6.02327e+06	46.24	6.34	2.66	0.0021645	2.66	0.0169225	1.58485	neg
(13E)-11a-Hydroxy-9,15-dioxoprost-13-enoic acid	M351T444	351.217	444	2.56252	C20H32O5	C04654	3.26101e+07	3.29617e+07	21.23	3.12406e+06	2.96864e+06	63.67	10.44	3.38	0.0021645	2.66	0.0169225	1.6244	neg
Digalacturonate	M351T72	351.058	72.3	3.38976	C12H18O13	C02273	1.60361e+06	1.51603e+06	29.81	3.32462e+06	2.98534e+06	32.27	0.48	-1.05	0.0021645	2.66	0.0169225	1.43125	neg
20-Hydroxy-leukotriene B4	M352T415	352.221	415.1	12.4922	C20H32O5	C04853	112202	90187.2	55.69	587134	654389	70.89	0.19	-2.39	0.00865801	2.06	0.0379119	1.22379	neg
Prostaglandin F1a	M355T492	355.248	492	2.25195	C20H36O5	C06475	302038	291566	38.07	1.38956e+06	1.59416e+06	48.28	0.22	-2.2	0.0411255	1.39	0.107548	1.38983	neg
20-Carboxy-leukotriene B4	M366T365	366.2	364.8	12.2884	C20H30O6	C05950	3.15869e+06	3.43289e+06	33.61	6.12235e+06	5.54254e+06	54.78	0.52	-0.95	0.0411255	1.39	0.107548	1.01243	neg
Thromboxane B2	M369T423	369.228	423.5	1.69001	C20H34O6	C05963	2.64696e+06	2.59071e+06	11.79	1.30812e+06	1.46897e+06	60.97	2.02	1.02	0.0021645	2.66	0.0169225	1.07563	neg
N2-Citryl-N6-acetyl-N6-hydroxy-L-lysine	M377T341	377.127	340.7	18.7633	C14H22N2O10	C20333	454753	238374	105.14	1.57333e+06	1.51051e+06	27.87	0.29	-1.79	0.0151515	1.82	0.054815	1.41919	neg
Sphingosine 1-phosphate	M379T533	379.248	532.9	1.84576	C18H38NO5P	C06124	1.72791e+06	1.79086e+06	23.3	2.83901e+07	3.32162e+07	52.69	0.06	-4.04	0.0021645	2.66	0.0169225	1.62055	neg
Celecoxib	M380T455	380.079	455	28.0889	C17H14F3N3O2S	C07589	130730	129299	44.66	1.16817e+07	1.18013e+07	93.27	0.01	-6.48	0.004329	2.36	0.024604	1.41448	neg
Benazepril	M423T542	423.203	542.1	24.2815	C24H28N2O5	C06843	5.23616e+06	5.42809e+06	43.07	1.90727e+07	1.53045e+07	73.54	0.27	-1.86	0.00865801	2.06	0.0379119	1.36898	neg
Glycocholic acid	M464T604	464.3	604.4	2.16898	C26H43NO6	C01921	1.99874e+06	1.75598e+06	51.72	490867	252734	130.96	4.07	2.03	0.0151515	1.82	0.054815	1.38786	neg
Androsterone glucuronide	M465T594	465.237	593.6	27.3495	C25H38O8	C11135	178160	158531	46.43	1.22071e+06	910422	80.65	0.15	-2.78	0.0021645	2.66	0.0169225	1.52495	neg
Maslinic acid	M472T633	472.245	633.1	6.8355	C30H48O4	C16939	6.7986e+07	6.91246e+07	41.18	1.0581e+07	1.12754e+07	40.74	6.43	2.68	0.0021645	2.66	0.0169225	1.64387	neg

## Sheet: Supplementary transcriptomData1
Sample	Raw Reads	Clean Reads	Clean Bases	Error(%)	Q20(%)	Q30(%)	GC Content(%)
CK_1	23590696	22487506	6729880108	0.02	96.88	95.38	49.91
CK_2	25710100	24282722	7266665918	0.02	96.94	95.3	49.4
CK_3	22650012	21476804	6423870528	0.03	96.61	95.45	49.36
CK_4	24378731	24004215	7103693825	0.02	97.01	95.98	49.83
CK_5	23835783	22293538	6806213723	0.03	96.21	95.02	49.57
CK_6	24942163	23195979	6996837721	0.02	97.1	94.94	48.87
FO+JZXJ-7_1	21204732	20617064	6168707616	0.02	96.93	94.8	48.3
FO+JZXJ-7_2	22249410	21080793	6307955844	0.03	97.89	95.61	49.13
FO+JZXJ-7_3	21998424	20024313	5993029088	0.02	97.08	94.85	48.64
FO+JZXJ-7_4	23025471	22436238	6472814324	0.03	97.41	95.01	49.82
FO+JZXJ-7_5	20155983	20010220	6002538792	0.02	97.53	95.19	48.74
FO+JZXJ-7_6	22379381	21402138	6278537793	0.02	97.02	95.23	49.04

## Sheet: Supplementary transcriptomData2
#GO_classify1	GO_classify2	All	DE
#Total_gene		20902	16
cellular component	extracellular region	1769	3
cellular component	cell	13216	11
cellular component	nucleoid	29	0
cellular component	membrane	8296	3
cellular component	cell junction	383	0
cellular component	membrane-enclosed lumen	2934	3
cellular component	macromolecular complex	3759	1
cellular component	organelle	8873	8
cellular component	other organism	206	1
cellular component	other organism part	206	1
cellular component	extracellular region part	1276	3
cellular component	organelle part	5586	4
cellular component	membrane part	7123	3
cellular component	synapse part	446	1
cellular component	cell part	13213	11
cellular component	synapse	612	1
cellular component	supramolecular complex	544	0
molecular function	transcription factor activity, protein binding	313	0
molecular function	nucleic acid binding transcription factor activity	965	2
molecular function	catalytic activity	5432	6
molecular function	signal transducer activity	2505	1
molecular function	structural molecule activity	489	0
molecular function	transporter activity	1003	1
molecular function	binding	11092	11
molecular function	electron carrier activity	55	0
molecular function	morphogen activity	3	0
molecular function	antioxidant activity	57	0
molecular function	metallochaperone activity	4	0
molecular function	protein tag	4	0
molecular function	chemoattractant activity	19	0
molecular function	translation regulator activity	26	0
molecular function	chemorepellent activity	14	0
molecular function	molecular transducer activity	2526	1
molecular function	toxin activity	2	0
molecular function	molecular function regulator	966	0
biological process	reproduction	899	1
biological process	cell killing	31	0
biological process	immune system process	1289	4
biological process	behavior	273	0
biological process	metabolic process	6743	8
biological process	cellular process	12257	7
biological process	reproductive process	897	1
biological process	biological adhesion	522	0
biological process	signaling	4538	4
biological process	multicellular organismal process	4822	3
biological process	developmental process	3114	3
biological process	growth	191	0
biological process	locomotion	619	0
biological process	single-organism process	10528	10
biological process	rhythmic process	127	1
biological process	response to stimulus	6677	10
biological process	localization	3345	2
biological process	multi-organism process	1464	8
biological process	biological regulation	10575	6
biological process	cellular component organization or biogenesis	3392	2
biological process	cell aggregation	10	0
biological process	detoxification	70	0
biological process	presynaptic process involved in chemical synaptic transmission	39	0

## Sheet: Supplementary transcriptomData3
#KEGG_n	9	KEGG_N	10676
#Pathway	ko_ID	DEgene	gene	DEgene_all	gene_all	Gene_id	Symbol	KOs
Estrogen signaling pathway	ko04915	1	135	9	10676	ENSMUSG00000091971	Hspa1a	K03283
Chemical carcinogenesis	ko05204	1	113	9	10676	ENSMUSG00000025479	Cyp2e1	K07415
Fc epsilon RI signaling pathway	ko04664	1	174	9	10676	Mus_musculus_newGene_12478	Mus_musculus_newGene_12478	K06856
Nitrogen metabolism	ko00910	1	21	9	10676	ENSMUSG00000027559	Car3	K01672
Primary immunodeficiency	ko05340	1	140	9	10676	Mus_musculus_newGene_12478	Mus_musculus_newGene_12478	K06856
Transcriptional misregulation in cancer	ko05202	1	387	9	10676	Mus_musculus_newGene_12478	Mus_musculus_newGene_12478	K06856
Fatty acid metabolism	ko01212	1	74	9	10676	ENSMUSG00000037071	Scd1	K00507
PPAR signaling pathway	ko03320	2	107	9	10676	ENSMUSG00000032418;ENSMUSG00000037071	Me1;Scd1	K00029+K00507
Toxoplasmosis	ko05145	1	110	9	10676	ENSMUSG00000091971	Hspa1a	K03283
PI3K-Akt signaling pathway	ko04151	2	519	9	10676	ENSMUSG00000020108;Mus_musculus_newGene_12478	Ddit4;Mus_musculus_newGene_12478	K08270+K06856
Antigen processing and presentation	ko04612	1	158	9	10676	ENSMUSG00000091971	Hspa1a	K03283
Natural killer cell mediated cytotoxicity	ko04650	1	249	9	10676	Mus_musculus_newGene_12478	Mus_musculus_newGene_12478	K06856
Legionellosis	ko05134	1	63	9	10676	ENSMUSG00000091971	Hspa1a	K03283
Dilated cardiomyopathy	ko05414	1	200	9	10676	Mus_musculus_newGene_12478	Mus_musculus_newGene_12478	K06856
Metabolism of xenobiotics by cytochrome P450	ko00980	1	87	9	10676	ENSMUSG00000025479	Cyp2e1	K07415
Yersinia infection	ko05135	1	289	9	10676	Mus_musculus_newGene_12478	Mus_musculus_newGene_12478	K06856
Asthma	ko05310	1	180	9	10676	Mus_musculus_newGene_12478	Mus_musculus_newGene_12478	K06856
Autoimmune thyroid disease	ko05320	1	250	9	10676	Mus_musculus_newGene_12478	Mus_musculus_newGene_12478	K06856
Drug metabolism - cytochrome P450	ko00982	1	79	9	10676	ENSMUSG00000025479	Cyp2e1	K07415
Longevity regulating pathway - multiple species	ko04213	1	68	9	10676	ENSMUSG00000091971	Hspa1a	K03283
Prion disease	ko05020	1	276	9	10676	ENSMUSG00000091971	Hspa1a	K03283
Epstein-Barr virus infection	ko05169	1	418	9	10676	Mus_musculus_newGene_12478	Mus_musculus_newGene_12478	K06856
Allograft rejection	ko05330	1	220	9	10676	Mus_musculus_newGene_12478	Mus_musculus_newGene_12478	K06856
Carbon metabolism	ko01200	1	150	9	10676	ENSMUSG00000032418	Me1	K00029
Intestinal immune network for IgA production	ko04672	1	201	9	10676	Mus_musculus_newGene_12478	Mus_musculus_newGene_12478	K06856
Autophagy - animal	ko04140	1	175	9	10676	ENSMUSG00000020108	Ddit4	K08270
Protein processing in endoplasmic reticulum	ko04141	1	194	9	10676	ENSMUSG00000091971	Hspa1a	K03283
mTOR signaling pathway	ko04150	1	195	9	10676	ENSMUSG00000020108	Ddit4	K08270
Rheumatoid arthritis	ko05323	1	254	9	10676	Mus_musculus_newGene_12478	Mus_musculus_newGene_12478	K06856
Calcium signaling pathway	ko04020	1	372	9	10676	Mus_musculus_newGene_12478	Mus_musculus_newGene_12478	K06856
Viral myocarditis	ko05416	1	247	9	10676	Mus_musculus_newGene_12478	Mus_musculus_newGene_12478	K06856
MAPK signaling pathway	ko04010	2	328	9	10676	ENSMUSG00000039384;ENSMUSG00000091971	Dusp10;Hspa1a	K20216+K03283
Linoleic acid metabolism	ko00591	1	58	9	10676	ENSMUSG00000025479	Cyp2e1	K07415
Hematopoietic cell lineage	ko04640	1	200	9	10676	Mus_musculus_newGene_12478	Mus_musculus_newGene_12478	K06856
Non-alcoholic fatty liver disease	ko04932	1	157	9	10676	ENSMUSG00000025479	Cyp2e1	K07415
Phagosome	ko04145	1	323	9	10676	Mus_musculus_newGene_12478	Mus_musculus_newGene_12478	K06856
NF-kappa B signaling pathway	ko04064	1	264	9	10676	Mus_musculus_newGene_12478	Mus_musculus_newGene_12478	K06856
Phospholipase D signaling pathway	ko04072	1	273	9	10676	Mus_musculus_newGene_12478	Mus_musculus_newGene_12478	K06856
Arachidonic acid metabolism	ko00590	1	121	9	10676	ENSMUSG00000025479	Cyp2e1	K07415
African trypanosomiasis	ko05143	1	138	9	10676	Mus_musculus_newGene_12478	Mus_musculus_newGene_12478	K06856
MicroRNAs in cancer	ko05206	1	173	9	10676	ENSMUSG00000020108	Ddit4	K08270
Endocytosis	ko04144	1	329	9	10676	ENSMUSG00000091971	Hspa1a	K03283
B cell receptor signaling pathway	ko04662	1	190	9	10676	Mus_musculus_newGene_12478	Mus_musculus_newGene_12478	K06856
AMPK signaling pathway	ko04152	1	130	9	10676	ENSMUSG00000037071	Scd1	K00507
Steroid hormone biosynthesis	ko00140	1	112	9	10676	ENSMUSG00000025479	Cyp2e1	K07415
Tuberculosis	ko05152	1	299	9	10676	Mus_musculus_newGene_12478	Mus_musculus_newGene_12478	K06856
Pyruvate metabolism	ko00620	1	49	9	10676	ENSMUSG00000032418	Me1	K00029
Systemic lupus erythematosus	ko05322	1	277	9	10676	Mus_musculus_newGene_12478	Mus_musculus_newGene_12478	K06856
Circadian rhythm	ko04710	1	27	9	10676	ENSMUSG00000020889	Nr1d1	K03728
Measles	ko05162	1	226	9	10676	ENSMUSG00000091971	Hspa1a	K03283
Drug metabolism - other enzymes	ko00983	1	114	9	10676	ENSMUSG00000025479	Cyp2e1	K07415
Staphylococcus aureus infection	ko05150	1	294	9	10676	Mus_musculus_newGene_12478	Mus_musculus_newGene_12478	K06856
Biosynthesis of unsaturated fatty acids	ko01040	1	41	9	10676	ENSMUSG00000037071	Scd1	K00507
Amoebiasis	ko05146	1	214	9	10676	Mus_musculus_newGene_12478	Mus_musculus_newGene_12478	K06856
Leishmaniasis	ko05140	1	171	9	10676	Mus_musculus_newGene_12478	Mus_musculus_newGene_12478	K06856
Fc gamma R-mediated phagocytosis	ko04666	1	197	9	10676	Mus_musculus_newGene_12478	Mus_musculus_newGene_12478	K06856
Spliceosome	ko03040	1	200	9	10676	ENSMUSG00000091971	Hspa1a	K03283
