# Supplementary material for: Integrated microbiome, metabolome and transcriptome profiling reveals the beneficial effects of fish oil and Bacillus subtilis jzxj-7 on mouse gut ecosystem
Source: Royal Society of Chemistry journal article supplement (doi:10.1039/d3fo04213h), 2024-01-01
Supplement: d3fo04213h3.xlsx [file d3fo04213h3.xlsx]

## Sheet: Supplementary Data 1
#GO_classify1	GO_classify2	All	DE
#Total_gene		20902	16
cellular component	extracellular region	1769	3
cellular component	cell	13216	11
cellular component	nucleoid	29	0
cellular component	membrane	8296	3
cellular component	cell junction	383	0
cellular component	membrane-enclosed lumen	2934	3
cellular component	macromolecular complex	3759	1
cellular component	organelle	8873	8
cellular component	other organism	206	1
cellular component	other organism part	206	1
cellular component	extracellular region part	1276	3
cellular component	organelle part	5586	4
cellular component	membrane part	7123	3
cellular component	synapse part	446	1
cellular component	cell part	13213	11
cellular component	synapse	612	1
cellular component	supramolecular complex	544	0
molecular function	transcription factor activity, protein binding	313	0
molecular function	nucleic acid binding transcription factor activity	965	2
molecular function	catalytic activity	5432	6
molecular function	signal transducer activity	2505	1
molecular function	structural molecule activity	489	0
molecular function	transporter activity	1003	1
molecular function	binding	11092	11
molecular function	electron carrier activity	55	0
molecular function	morphogen activity	3	0
molecular function	antioxidant activity	57	0
molecular function	metallochaperone activity	4	0
molecular function	protein tag	4	0
molecular function	chemoattractant activity	19	0
molecular function	translation regulator activity	26	0
molecular function	chemorepellent activity	14	0
molecular function	molecular transducer activity	2526	1
molecular function	toxin activity	2	0
molecular function	molecular function regulator	966	0
biological process	reproduction	899	1
biological process	cell killing	31	0
biological process	immune system process	1289	4
biological process	behavior	273	0
biological process	metabolic process	6743	8
biological process	cellular process	12257	7
biological process	reproductive process	897	1
biological process	biological adhesion	522	0
biological process	signaling	4538	4
biological process	multicellular organismal process	4822	3
biological process	developmental process	3114	3
biological process	growth	191	0
biological process	locomotion	619	0
biological process	single-organism process	10528	10
biological process	rhythmic process	127	1
biological process	response to stimulus	6677	10
biological process	localization	3345	2
biological process	multi-organism process	1464	8
biological process	biological regulation	10575	6
biological process	cellular component organization or biogenesis	3392	2
biological process	cell aggregation	10	0
biological process	detoxification	70	0
biological process	presynaptic process involved in chemical synaptic transmission	39	0

## Sheet: Supplementary Data 2
#KEGG_n	9	KEGG_N	10676
#Pathway	ko_ID	DEgene	gene	DEgene_all	gene_all	Gene_id	Symbol	KOs
Estrogen signaling pathway	ko04915	1	135	9	10676	ENSMUSG00000091971	Hspa1a	K03283
Chemical carcinogenesis	ko05204	1	113	9	10676	ENSMUSG00000025479	Cyp2e1	K07415
Fc epsilon RI signaling pathway	ko04664	1	174	9	10676	Mus_musculus_newGene_12478	Mus_musculus_newGene_12478	K06856
Nitrogen metabolism	ko00910	1	21	9	10676	ENSMUSG00000027559	Car3	K01672
Primary immunodeficiency	ko05340	1	140	9	10676	Mus_musculus_newGene_12478	Mus_musculus_newGene_12478	K06856
Transcriptional misregulation in cancer	ko05202	1	387	9	10676	Mus_musculus_newGene_12478	Mus_musculus_newGene_12478	K06856
Fatty acid metabolism	ko01212	1	74	9	10676	ENSMUSG00000037071	Scd1	K00507
PPAR signaling pathway	ko03320	2	107	9	10676	ENSMUSG00000032418;ENSMUSG00000037071	Me1;Scd1	K00029+K00507
Toxoplasmosis	ko05145	1	110	9	10676	ENSMUSG00000091971	Hspa1a	K03283
PI3K-Akt signaling pathway	ko04151	2	519	9	10676	ENSMUSG00000020108;Mus_musculus_newGene_12478	Ddit4;Mus_musculus_newGene_12478	K08270+K06856
Antigen processing and presentation	ko04612	1	158	9	10676	ENSMUSG00000091971	Hspa1a	K03283
Natural killer cell mediated cytotoxicity	ko04650	1	249	9	10676	Mus_musculus_newGene_12478	Mus_musculus_newGene_12478	K06856
Legionellosis	ko05134	1	63	9	10676	ENSMUSG00000091971	Hspa1a	K03283
Dilated cardiomyopathy	ko05414	1	200	9	10676	Mus_musculus_newGene_12478	Mus_musculus_newGene_12478	K06856
Metabolism of xenobiotics by cytochrome P450	ko00980	1	87	9	10676	ENSMUSG00000025479	Cyp2e1	K07415
Yersinia infection	ko05135	1	289	9	10676	Mus_musculus_newGene_12478	Mus_musculus_newGene_12478	K06856
Asthma	ko05310	1	180	9	10676	Mus_musculus_newGene_12478	Mus_musculus_newGene_12478	K06856
Autoimmune thyroid disease	ko05320	1	250	9	10676	Mus_musculus_newGene_12478	Mus_musculus_newGene_12478	K06856
Drug metabolism - cytochrome P450	ko00982	1	79	9	10676	ENSMUSG00000025479	Cyp2e1	K07415
Longevity regulating pathway - multiple species	ko04213	1	68	9	10676	ENSMUSG00000091971	Hspa1a	K03283
Prion disease	ko05020	1	276	9	10676	ENSMUSG00000091971	Hspa1a	K03283
Epstein-Barr virus infection	ko05169	1	418	9	10676	Mus_musculus_newGene_12478	Mus_musculus_newGene_12478	K06856
Allograft rejection	ko05330	1	220	9	10676	Mus_musculus_newGene_12478	Mus_musculus_newGene_12478	K06856
Carbon metabolism	ko01200	1	150	9	10676	ENSMUSG00000032418	Me1	K00029
Intestinal immune network for IgA production	ko04672	1	201	9	10676	Mus_musculus_newGene_12478	Mus_musculus_newGene_12478	K06856
Autophagy - animal	ko04140	1	175	9	10676	ENSMUSG00000020108	Ddit4	K08270
Protein processing in endoplasmic reticulum	ko04141	1	194	9	10676	ENSMUSG00000091971	Hspa1a	K03283
mTOR signaling pathway	ko04150	1	195	9	10676	ENSMUSG00000020108	Ddit4	K08270
Rheumatoid arthritis	ko05323	1	254	9	10676	Mus_musculus_newGene_12478	Mus_musculus_newGene_12478	K06856
Calcium signaling pathway	ko04020	1	372	9	10676	Mus_musculus_newGene_12478	Mus_musculus_newGene_12478	K06856
Viral myocarditis	ko05416	1	247	9	10676	Mus_musculus_newGene_12478	Mus_musculus_newGene_12478	K06856
MAPK signaling pathway	ko04010	2	328	9	10676	ENSMUSG00000039384;ENSMUSG00000091971	Dusp10;Hspa1a	K20216+K03283
Linoleic acid metabolism	ko00591	1	58	9	10676	ENSMUSG00000025479	Cyp2e1	K07415
Hematopoietic cell lineage	ko04640	1	200	9	10676	Mus_musculus_newGene_12478	Mus_musculus_newGene_12478	K06856
Non-alcoholic fatty liver disease	ko04932	1	157	9	10676	ENSMUSG00000025479	Cyp2e1	K07415
Phagosome	ko04145	1	323	9	10676	Mus_musculus_newGene_12478	Mus_musculus_newGene_12478	K06856
NF-kappa B signaling pathway	ko04064	1	264	9	10676	Mus_musculus_newGene_12478	Mus_musculus_newGene_12478	K06856
Phospholipase D signaling pathway	ko04072	1	273	9	10676	Mus_musculus_newGene_12478	Mus_musculus_newGene_12478	K06856
Arachidonic acid metabolism	ko00590	1	121	9	10676	ENSMUSG00000025479	Cyp2e1	K07415
African trypanosomiasis	ko05143	1	138	9	10676	Mus_musculus_newGene_12478	Mus_musculus_newGene_12478	K06856
MicroRNAs in cancer	ko05206	1	173	9	10676	ENSMUSG00000020108	Ddit4	K08270
Endocytosis	ko04144	1	329	9	10676	ENSMUSG00000091971	Hspa1a	K03283
B cell receptor signaling pathway	ko04662	1	190	9	10676	Mus_musculus_newGene_12478	Mus_musculus_newGene_12478	K06856
AMPK signaling pathway	ko04152	1	130	9	10676	ENSMUSG00000037071	Scd1	K00507
Steroid hormone biosynthesis	ko00140	1	112	9	10676	ENSMUSG00000025479	Cyp2e1	K07415
Tuberculosis	ko05152	1	299	9	10676	Mus_musculus_newGene_12478	Mus_musculus_newGene_12478	K06856
Pyruvate metabolism	ko00620	1	49	9	10676	ENSMUSG00000032418	Me1	K00029
Systemic lupus erythematosus	ko05322	1	277	9	10676	Mus_musculus_newGene_12478	Mus_musculus_newGene_12478	K06856
Circadian rhythm	ko04710	1	27	9	10676	ENSMUSG00000020889	Nr1d1	K03728
Measles	ko05162	1	226	9	10676	ENSMUSG00000091971	Hspa1a	K03283
Drug metabolism - other enzymes	ko00983	1	114	9	10676	ENSMUSG00000025479	Cyp2e1	K07415
Staphylococcus aureus infection	ko05150	1	294	9	10676	Mus_musculus_newGene_12478	Mus_musculus_newGene_12478	K06856
Biosynthesis of unsaturated fatty acids	ko01040	1	41	9	10676	ENSMUSG00000037071	Scd1	K00507
Amoebiasis	ko05146	1	214	9	10676	Mus_musculus_newGene_12478	Mus_musculus_newGene_12478	K06856
Leishmaniasis	ko05140	1	171	9	10676	Mus_musculus_newGene_12478	Mus_musculus_newGene_12478	K06856
Fc gamma R-mediated phagocytosis	ko04666	1	197	9	10676	Mus_musculus_newGene_12478	Mus_musculus_newGene_12478	K06856
Spliceosome	ko03040	1	200	9	10676	ENSMUSG00000091971	Hspa1a	K03283
